# Supplementary material for: Bio-oil production via catalytic microwave pyrolysis of model municipal solid waste component mixtures
Source: Royal Society of Chemistry journal article supplement (doi:10.1039/c5ra08666c), 2015-01-01
Supplement: c5ra08666c1.pdf [file c5ra08666c1.pdf]

**Supplementary Data**

**Bio-oil Production via Catalytic Microwave Pyrolysis of Model Municipal  
Solid Waste Component Mixtures**

**Dadi V. Suriapparao<sup>a</sup>, R. Vinu<sup>a,b,\*</sup>**

<sup>a</sup> Department of Chemical Engineering, Indian Institute of Technology Madras, Chennai –  
600036, India.

<sup>b</sup> National Centre for Combustion Research and Development, Indian Institute of Technology  
Madras, Chennai-600036, India.

---

---

\* Corresponding Author. Phone: +91-44-22574187. E-mail: [vinu@iitm.ac.in](mailto:vinu@iitm.ac.in) (R. Vinu)

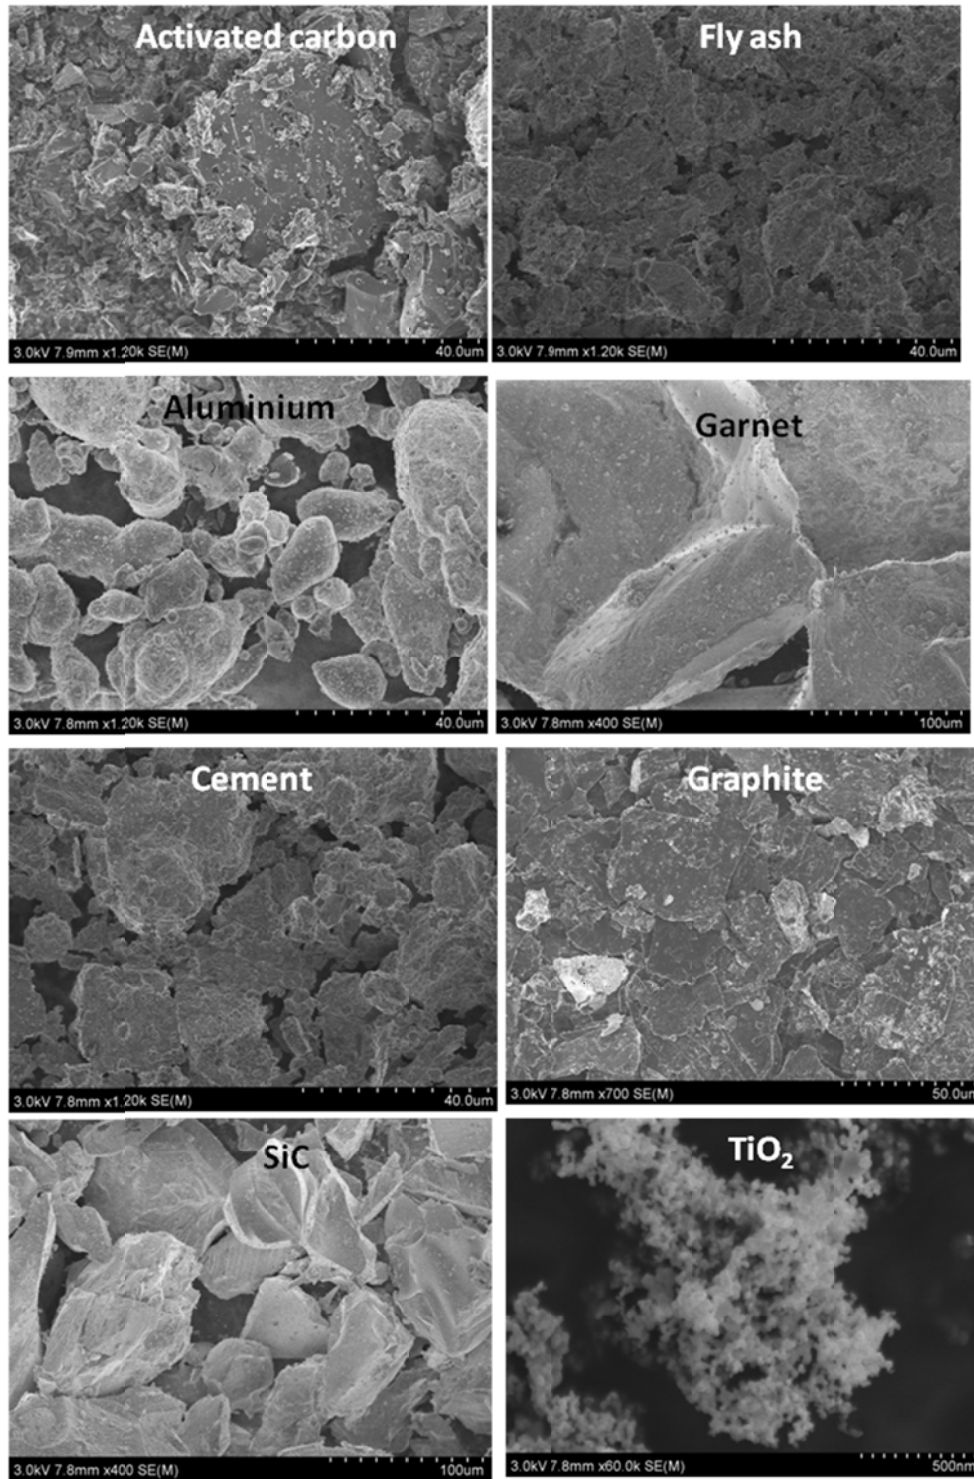

**Figure S1. SEM micrographs of various susceptors.**

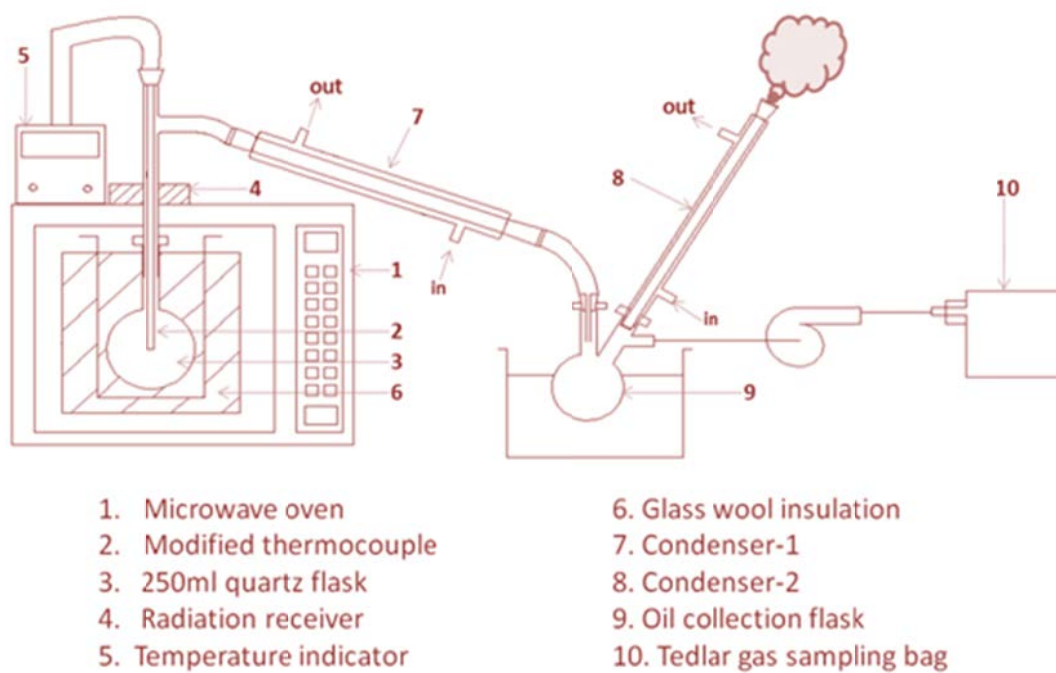

**Figure S2. Schematic of the microwave pyrolysis experimental set-up.**<sup>21,24</sup>

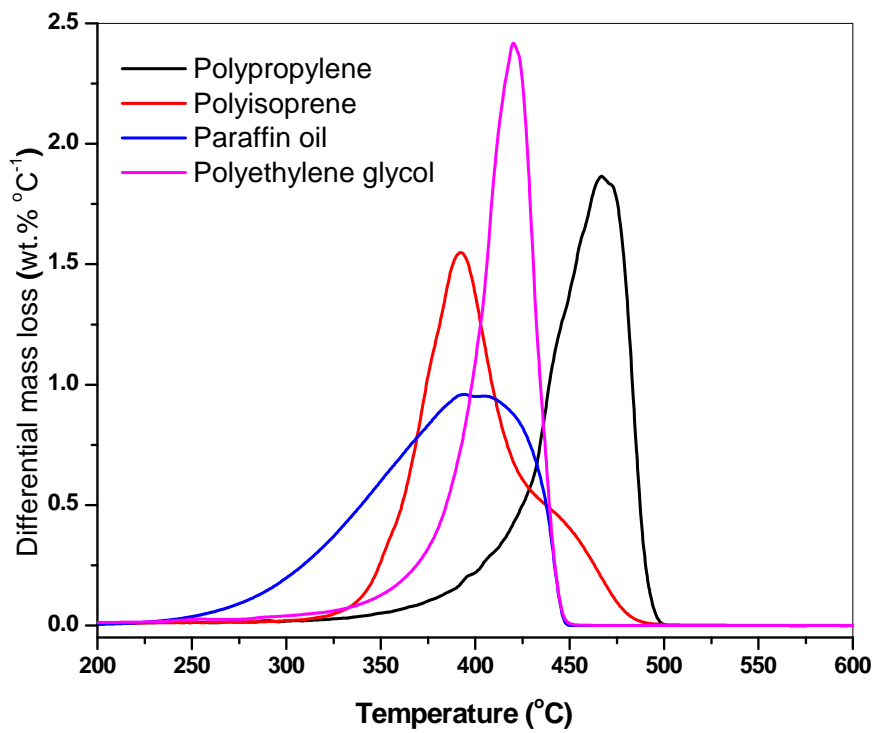

**Figure S3. Differential mass loss profiles of various polymers and paraffin oil.**

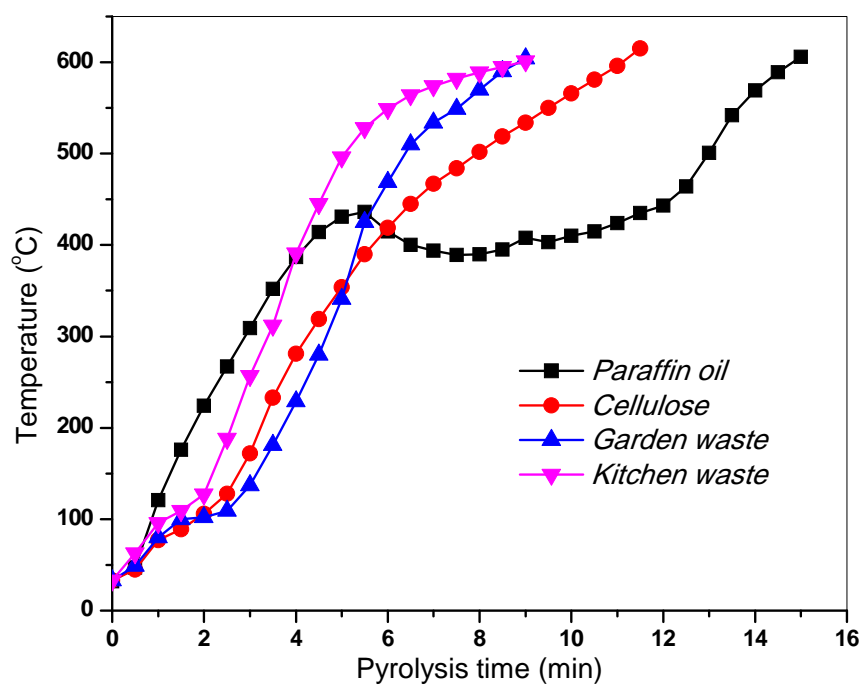

**Figure S4. Temperature profiles achieved during the pyrolysis of individual MSW components at 450 W microwave power and 1:1 wt./wt. of feed:graphite.**

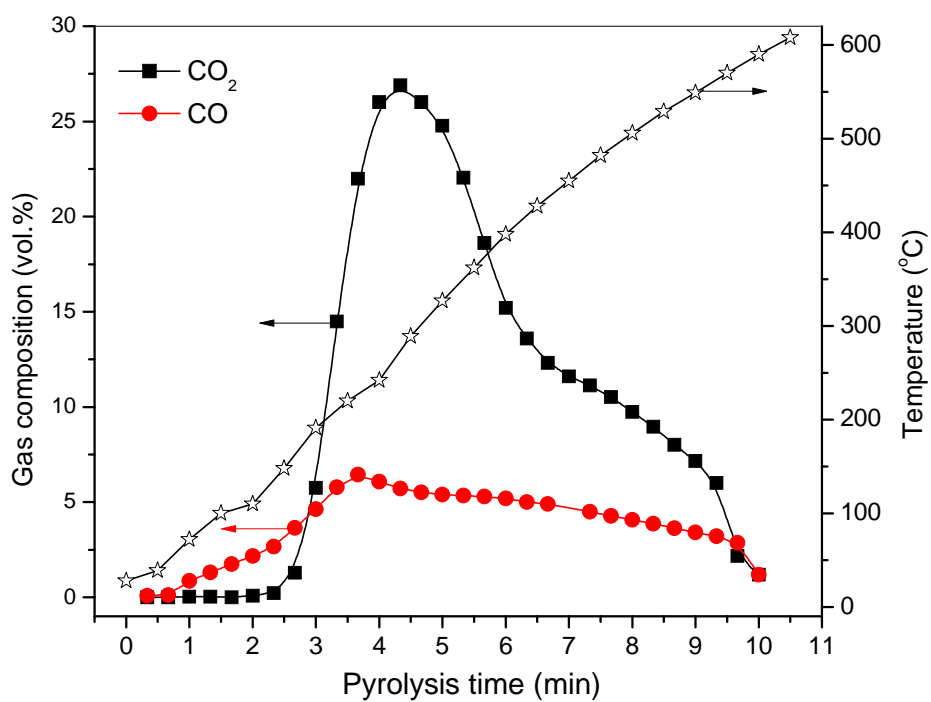

**Figure S5. Online analysis of CO and CO<sub>2</sub> during microwave pyrolysis of 1:1 MSW-A:graphite. Compared to CO<sub>2</sub>, CO evolution was very low owing to the composition of the model MSW mixture.**

**Table S1. Composition of garnet, cement, fly ash, silica beads and TiO<sub>2</sub>.**

| <b>Garnet</b>                                                   | <b>Composition (wt.%)</b> |
|-----------------------------------------------------------------|---------------------------|
| SiO <sub>2</sub>                                                | 43.16                     |
| Fe <sub>2</sub> O <sub>3</sub>                                  | 32.17                     |
| MgO                                                             | 9.13                      |
| Al <sub>2</sub> O <sub>3</sub>                                  | 6.49                      |
| CaO                                                             | 3.87                      |
| FeO                                                             | 5.18                      |
| <b>Cement</b>                                                   | <b>Composition (wt.%)</b> |
| Ca <sub>3</sub> Al <sub>2</sub> O <sub>6</sub>                  | 9.87                      |
| Ca <sub>4</sub> Al <sub>2</sub> Fe <sub>2</sub> O <sub>10</sub> | 8.34                      |
| Ca <sub>2</sub> SiO <sub>5</sub>                                | 19.59                     |
| Ca <sub>3</sub> SiO <sub>4</sub>                                | 55.38                     |
| Na <sub>2</sub> O & K <sub>2</sub> O                            | 1.94                      |
| CaSO <sub>4</sub> .2H <sub>2</sub> O                            | 4.88                      |
| <b>Fly ash</b>                                                  | <b>Composition (wt.%)</b> |
| SiO <sub>2</sub>                                                | 26.97                     |
| Fe <sub>2</sub> O <sub>3</sub>                                  | 4.77                      |
| CaO                                                             | 17.85                     |
| MgO                                                             | 2.00                      |
| Al <sub>2</sub> O <sub>3</sub>                                  | 10.34                     |
| Na <sub>2</sub> O                                               | 1.05                      |
| K <sub>2</sub> O                                                | 8.40                      |
| TiO <sub>2</sub>                                                | 0.70                      |
| LOI*                                                            | 14.71%                    |
| <b>Silica beads</b>                                             | <b>Composition (wt.%)</b> |
| SiO <sub>2</sub>                                                | 69-71                     |
| CaO                                                             | 8-9                       |
| Na <sub>2</sub> O                                               | 13                        |
| K <sub>2</sub> O                                                | 5                         |

| Al <sub>2</sub> O <sub>3</sub>         | 1                         |
|----------------------------------------|---------------------------|
| <b>Aeroxide® TiO<sub>2</sub> P25**</b> | <b>Composition (wt.%)</b> |
| TiO <sub>2</sub>                       | ≥ 99.50                   |
| Al <sub>2</sub> O <sub>3</sub>         | ≤ 0.30                    |
| SiO <sub>2</sub>                       | ≤ 0.20                    |
| Fe <sub>2</sub> O <sub>3</sub>         | ≤ 0.01                    |
| HCl                                    | ≤ 0.30                    |
| LOI*                                   | ≤ 2.0%                    |

\*LOI - loss on ignition

\*\*Aeroxide® TiO<sub>2</sub> P 25, Evonik Industries, 2007, [www.aerosil.com](http://www.aerosil.com) (accessed 20 Nov. 2014).

**Table S2. Composition of bio-oil obtained by pyrolyzing paraffin oil with graphite at 1:1 (wt./wt.) on moisture free basis.**

| <b>Product</b>                 | <b>Composition (area%)</b> |
|--------------------------------|----------------------------|
| <b>Alkanes</b>                 | <b>25.32</b>               |
| Heptane                        | 2.70                       |
| Pentane, 3-ethyl-2-methyl-     | 1.63                       |
| Octane                         | 4.04                       |
| Octane, 3-methyl-              | 1.18                       |
| Nonane                         | 3.96                       |
| Decane                         | 4.74                       |
| 1,8-Dimethyl decane            | 1.36                       |
| Heptane, 3,4-dimethyl-         | 1.99                       |
| 2,9-Dimethylundecane           | 1.20                       |
| Decane, 2,4,6-trimethyl-       | 1.06                       |
| Dodecane, 2,6,10-trimethyl-    | 0.90                       |
| Undecane, 3,4-dimethyl-        | 0.54                       |
| <b>Cycloalkanes</b>            | <b>5.46</b>                |
| Cyclohexane, methyl-           | 0.70                       |
| Cyclopentane, pentyl-          | 0.73                       |
| Cyclooctane, 1,2-dimethyl-     | 0.95                       |
| Cyclopropane, octyl-           | 1.40                       |
| Cyclopentane, 1,1,3-trimethyl- | 1.01                       |
| Cyclopentane, decyl-           | 0.68                       |
| <b>Alkenes</b>                 | <b>35.68</b>               |
| 1,3,5-Hexatriene               | 1.16                       |
| 1-Heptene                      | 5.19                       |
| 1-Heptene, 2-methyl-           | 2.22                       |
| 1-Octene                       | 2.93                       |
| 1-Octene, 7-methyl-            | 0.63                       |
| 1-Nonene                       | 4.71                       |
| 11-Tricosene                   | 1.03                       |
| 1-Decene                       | 4.52                       |
| 2-Dodecene                     | 4.49                       |
| 5-Dodecene                     | 0.65                       |
| 3-Dodecene                     | 0.84                       |
| 1-Octene, 3,7-dimethyl-        | 0.89                       |
| 4-Tetradecene                  | 2.15                       |
| 1-Nonadecene                   | 0.81                       |
| 3-Eicosene                     | 1.57                       |



|                                                     |              |
|-----------------------------------------------------|--------------|
| 9-Octadecene                                        | 1.17         |
| 1-Nonadecene                                        | 0.74         |
| <b>Cycloalkenes</b>                                 | <b>5.23</b>  |
| Cyclopentene, 4,4-dimethyl-                         | 0.80         |
| 1,3-Cyclopentadiene, 1,2-dimethyl-                  | 0.90         |
| Cyclohexane, 2-propenyl-                            | 1.30         |
| Cyclohexane, 1,1-dimethyl-2-propyl                  | 0.81         |
| Cyclohexene, 1,6-dimethyl-                          | 0.57         |
| Cyclohexane, 1,2-dimethyl-3,5-bis(1-methylethenyl)- | 0.85         |
| <b>Alkynes</b>                                      | <b>7.33</b>  |
| 5-Dodecyne                                          | 1.87         |
| 7-Tetradecyne                                       | 2.29         |
| 8-Hexadecyne                                        | 0.69         |
| 7-Hexadecyne                                        | 0.95         |
| 1-Hexadecyne                                        | 0.92         |
| 1-Pentadecyne                                       | 0.61         |
| <b>Single ring aromatic hydrocarbons</b>            | <b>9.37</b>  |
| Benzene                                             | 3.12         |
| Toluene                                             | 2.64         |
| P-Xylene                                            | 2.97         |
| Benzene, 1-ethyl-4-methyl-                          | 0.63         |
| <b>Polycyclic aromatic hydrocarbons</b>             | <b>3.10</b>  |
| Indene                                              | 2.35         |
| Naphthalene, 1-methyl-                              | 0.75         |
| <b>Total</b>                                        | <b>91.49</b> |

**Table S3. Composition of bio-oil obtained by pyrolyzing cellulose with graphite at 1:1 (wt./wt.) on moisture free basis.**

| <b>Product</b>                                                | <b>Composition (area%)</b> |
|---------------------------------------------------------------|----------------------------|
| <b>Furan derivatives</b>                                      | <b>9.60</b>                |
| Furfural                                                      | 5.24                       |
| Ethanone, 1-(2-furanyl)-                                      | 1.31                       |
| Furanone, 5-methyl-                                           | 0.12                       |
| 2-Furancarboxaldehyde, 5-methyl- ( <b>5-methyl furfural</b> ) | 2.93                       |
| <b>Phenolics</b>                                              | <b>0.17</b>                |
| P-Cresol                                                      | 0.10                       |
| Phenol, 2,4-dimethyl-                                         | 0.07                       |
| <b>Alkanes</b>                                                | <b>0.94</b>                |

|                                                                |              |
|----------------------------------------------------------------|--------------|
| Tritetracontane                                                | 0.15         |
| Hexadecane                                                     | 0.79         |
| <b>Cycloalkanes</b>                                            | <b>6.26</b>  |
| Cyclohexane, 1,1'-(1,2-dimethyl-1,2-ethanediyl)-               | 1.42         |
| Cyclohexane, 1,2-dimethyl-3-pentyl-4-propyl                    | 0.93         |
| Cyclohexane, 2,4-diisopropyl-1,1-dimethyl-                     | 0.82         |
| Cyclotetracosane                                               | 0.50         |
| Cyclohexane, 1,2,4,5-tetraethyl-                               | 0.61         |
| Cyclotetracosane                                               | 0.55         |
| Cyclodocosane, ethyl-                                          | 1.43         |
| <b>Alkenes</b>                                                 | <b>10.57</b> |
| 1-Docosene                                                     | 1.42         |
| 1-Nonadecene                                                   | 2.84         |
| 5-Methyl-Z-5-docosene                                          | 0.43         |
| 1-Hexacosene                                                   | 1.42         |
| 2,6,10,14-Tetramethyl-7-(3-methylpent-4-enylidene) pentadecane | 4.46         |
| <b>Cycloalkenes</b>                                            | <b>0.21</b>  |
| Cyclohexene, 4-(4-ethylcyclohexyl)-1-pentyl                    | 0.21         |
| <b>Alkynes</b>                                                 | <b>0.70</b>  |
| 8-Hexadecyne                                                   | 0.70         |
| <b>Ketone derivatives</b>                                      | <b>2.53</b>  |
| 2-Propanone, 1-hydroxy- ( <b>Acetol</b> )                      | 0.36         |
| Ethanone, 1-cyclopropyl-                                       | 0.09         |
| 3-Hexanone                                                     | 0.51         |
| 3-Penten-2-one                                                 | 0.20         |
| Cyclopentanone                                                 | 0.11         |
| 5,9-Dodecadien-2-one, 6,10-dimethyl                            | 0.18         |
| 4-Cyclopentene-1,3-dione                                       | 0.22         |
| 1,2-Cyclopentanedione                                          | 0.09         |
| 2-Butanone, 1-(acetyloxy)-                                     | 0.10         |
| 2-Cyclopenten-1-one, 3-methyl-                                 | 0.28         |
| Levoglucosenone                                                | 0.39         |
| <b>Alcohols derivates</b>                                      | <b>11.65</b> |
| 1,2-Ethanediol, diacetate                                      | 0.43         |
| 2,6,10-Undecatrien-8-ol, 2,6-dimethyl                          | 0.09         |
| Octacosanol                                                    | 0.47         |
| Behenic alcohol                                                | 0.11         |
| 1-Heneicosanol                                                 | 2.21         |
| Tetracosanol                                                   | 1.49         |
| 11,13-Dimethyl-12-tetradecen-1-ol acetate                      | 0.61         |
| 14-Methyl-8-hexadecyn-1-ol                                     | 0.42         |

|                                  |              |
|----------------------------------|--------------|
| 1-Heptacosanol                   | 5.82         |
| <b>Aliphatic aldehydes/acids</b> | <b>0.92</b>  |
| 2-Butenal                        | 0.39         |
| Nonahexacontanoic acid           | 0.53         |
| <b>Total</b>                     | <b>43.55</b> |

**Table S4. Composition of bio-oil obtained by pyrolyzing garden waste with graphite at 1:1 (wt./wt.) on moisture free basis.**

| <b>Product</b>                               | <b>Composition (area%)</b> |
|----------------------------------------------|----------------------------|
| <b>Furan derivatives</b>                     | <b>3.92</b>                |
| Furfural                                     | 3.10                       |
| 3-Furanmethanol                              | 0.15                       |
| Butyrolactone                                | 0.09                       |
| 2-Furancarboxaldehyde, 5-methyl-             | 0.10                       |
| Benzofuran, 2,3-dihydro-                     | 0.48                       |
| <b>Aromatics</b>                             | <b>1.03</b>                |
| Toluene                                      | 0.53                       |
| P-Xylene                                     | 0.34                       |
| Benzene, 1-ethenyl-2-methyl-                 | 0.16                       |
| <b>Condensed ring aromatics</b>              | <b>0.71</b>                |
| Naphthalene                                  | 0.46                       |
| Naphthalene, 1,2,3,4-tetrahydro-5,6-dimethyl | 0.08                       |
| Naphthalene, 2-methyl-                       | 0.17                       |
| <b>Phenolics</b>                             | <b>4.25</b>                |
| Phenol                                       | 0.89                       |
| P-Cresol                                     | 1.20                       |
| Phenol, 2-methoxy-                           | 0.56                       |
| Phenol, 2,5-dimethyl-                        | 0.18                       |
| Phenol, 4-ethyl-                             | 0.14                       |
| Phenol, 2,4-dimethyl-                        | 0.06                       |
| 2-Methoxy-4-vinylphenol                      | 0.75                       |
| 3-Hydroxy-4-methoxybenzoic acid              | 0.23                       |
| P-tert-Butyl catechol                        | 0.08                       |
| Phenol, 2,6-dimethoxy-4-(2-propenyl)-        | 0.16                       |
| <b>Alkanes</b>                               | <b>0.00</b>                |
| <b>Cycloalkanes</b>                          | <b>4.09</b>                |
| Cyclohexane, 1,2-dimethyl-3-pentyl-4-propyl- | 4.09                       |
| <b>Cycloalkenes</b>                          | <b>1.05</b>                |

|                                                                |              |
|----------------------------------------------------------------|--------------|
| Cyclohexane, 1,1'-(1,2-dimethyl-1,2-ethanediyl)-               | 1.05         |
| <b>Alkenes</b>                                                 | <b>12.24</b> |
| 1-Hexacosene                                                   | 2.77         |
| 12-Pentacosene                                                 | 0.18         |
| 2,6,10,14-Tetramethyl-7-(3-methylpent-4-enylidene) pentadecane | 9.29         |
| <b>Ketone derivatives</b>                                      | <b>2.16</b>  |
| 2-Propanone, 1-hydroxy-                                        | 1.03         |
| 3-Buten-2-one, 3-methyl-                                       | 0.09         |
| 3-Penten-2-one                                                 | 0.10         |
| Cyclopentanone                                                 | 0.08         |
| 2-Propanone, 1-(acetyloxy)-                                    | 0.63         |
| 1,2-Cyclopentanedione                                          | 0.07         |
| Bicycloheptane-2,5-dione, 1,7,7-trimethyl-                     | 0.16         |
| <b>Alcohol derivatives</b>                                     | <b>0.81</b>  |
| 6-Octen-1-ol, 3,7-dimethyl-, acetate                           | 0.16         |
| Cycloheptanol, 2-methylene                                     | 0.65         |
| <b>Other oxygenates</b>                                        | <b>1.57</b>  |
| Acetic acid                                                    | 0.24         |
| Propanoic acid, 2-oxo-, methyl ester                           | 0.10         |
| Maltol                                                         | 0.06         |
| 2-Propenal, 2-methyl-3-phenyl-                                 | 0.17         |
| 4-Ethylbenzoic acid, but-3-yn-2-yl ester                       | 0.08         |
| 4-Methoxy-2-methyl-1-(methylthio)benzene                       | 0.06         |
| 4-Methyl-2,5-dimethoxybenzaldehyde                             | 0.06         |
| Tridecanedial                                                  | 0.74         |
| 2-Naphthalenone, octahydro-4,7,7-trimethyl-                    | 0.06         |
| <b>Total</b>                                                   | <b>31.83</b> |

**Table S5. Composition of bio-oil obtained by pyrolyzing kitchen waste with graphite at 1:1 (wt./wt.) on moisture free basis.**

| <b>Product</b>                   | <b>Composition (area%)</b> |
|----------------------------------|----------------------------|
| <b>Furan derivatives</b>         | <b>7.61</b>                |
| Furfural                         | 4.28                       |
| 2-Furanmethanol                  | 0.67                       |
| Butyrolactone                    | 0.40                       |
| 2-Furancarboxaldehyde, 5-methyl- | 2.09                       |
| 2-Acetyl-5-methylfuran           | 0.09                       |
| Benzofuran, 2-methyl-            | 0.08                       |

|                                                                |             |
|----------------------------------------------------------------|-------------|
| <b>Aromatics</b>                                               | <b>0.25</b> |
| Toluene                                                        | 0.25        |
| <b>Condensed ring aromatics</b>                                | <b>0.35</b> |
| Indene, 1-methyl-                                              | 0.10        |
| Naphthalene                                                    | 0.12        |
| Naphthalene, 2,6-bis(1,1-dimethylethyl)-                       | 0.08        |
| Indene, 4,7-dimethyl-                                          | 0.05        |
| <b>Phenolics</b>                                               | <b>3.41</b> |
| Phenol                                                         | 0.38        |
| Phenol, 2,4-dimethyl-                                          | 0.60        |
| Phenol, 3-ethyl-                                               | 0.14        |
| P-Cresol                                                       | 2.07        |
| Phenol, 2-methoxy-                                             | 0.07        |
| 2-Methoxy-4-vinylphenol                                        | 0.06        |
| Trans-Isoeugenol                                               | 0.09        |
| <b>Alkanes</b>                                                 | <b>1.37</b> |
| Tetracosane                                                    | 0.90        |
| Octadecane                                                     | 0.47        |
| <b>Cycloalkanes</b>                                            | <b>2.5</b>  |
| Cyclohexane, 1,2-dimethyl-3-pentyl-4-propyl-                   | 2.50        |
| <b>Alkenes</b>                                                 | <b>9.8</b>  |
| Limonene                                                       | 0.06        |
| 1-Hexacosene                                                   | 2.41        |
| 2,4-Hexadiene, 3,4-dimethyl-                                   | 0.04        |
| 2,6,10,14-Tetramethyl-7-(3-methylpent-4-enylidene) pentadecane | 7.29        |
| <b>Ketone derivatives</b>                                      | <b>2.86</b> |
| 2-Propanone, 1-hydroxy-                                        | 1.20        |
| 3-Penten-2-one                                                 | 0.08        |
| 2-Cyclopenten-1-one, 2-methyl-                                 | 0.94        |
| 2-Cyclopenten-1-one, 3-methyl-                                 | 0.07        |
| 2-Cyclopenten-1-one, 3,4-dimethyl-                             | 0.18        |
| 1,2-Cyclopentanedione, 3-methyl-                               | 0.22        |
| 7-Methylindan-1-one                                            | 0.04        |
| Cyclohexanone, 3-ethenyl-                                      | 0.08        |
| Ethanone, 1-(methylenecyclopropyl)                             | 0.05        |
| <b>Alcohol derivatives</b>                                     | <b>2.80</b> |
| 2-Methyl-1,5-hexadiene-3-ol                                    | 0.05        |
| 3-Methylbenzyl alcohol                                         | 0.10        |
| Cycloheptanol, 2-methylene                                     | 1.44        |
| 11,13-Dimethyl-12-tetradecen-1-ol acetate                      | 1.21        |
| <b>Other oxygenates</b>                                        | <b>3.20</b> |

|                                                |              |
|------------------------------------------------|--------------|
| 1,6-Dianhydro-.alpha.-d-glucopyranose          | 0.18         |
| 4-Acetylphenyl ether                           | 0.21         |
| Fumaric acid, 4-cyanophenyl dodecyl ester      | 1.40         |
| Tridecanedial                                  | 1.20         |
| Benzene, 1-ethyl-4-methoxy-                    | 0.10         |
| Cyclopropane, 1-(1'-propenyl)-2-hydroxymethyl- | 0.11         |
| <b>Total</b>                                   | <b>34.15</b> |

**Table S6. Composition of bio-oil obtained from experiment E1 on moisture free basis.**

| <b>Product</b>                                        | <b>Composition (area%)</b> |
|-------------------------------------------------------|----------------------------|
| <b>Furan derivatives</b>                              | <b>5.66</b>                |
| Furan, 2,5-dimethyl-                                  | 0.51                       |
| Furfural                                              | 3.56                       |
| Ethanone, 1-(2-furanyl)-                              | 0.26                       |
| 5-Isopropyl-3,3-dimethyl-2-methylene-2,3-dihydrofuran | 0.25                       |
| 2-Furancarboxaldehyde, 5-methyl-                      | 1.08                       |
| <b>Single ring aromatic hydrocarbons</b>              | <b>11.47</b>               |
| Benzene                                               | 1.17                       |
| Toluene                                               | 4.22                       |
| Ethylbenzene                                          | 0.81                       |
| P-Xylene                                              | 1.69                       |
| Styrene                                               | 2.09                       |
| Benzene, propyl-                                      | 0.16                       |
| Benzene, 1,2,4-trimethyl-                             | 0.21                       |
| Benzene, 1-ethenyl-3-methyl-                          | 0.38                       |
| Benzene, [1-(2,4-cyclopentadien-1-ylidene)ethyl]-     | 0.19                       |
| Benzene, pentyl-                                      | 0.26                       |
| Benzene, (1,2-dimethyl-1-propenyl)                    | 0.29                       |
| <b>Polycyclic aromatic hydrocarbons</b>               | <b>5.18</b>                |
| Indene                                                | 0.47                       |
| 1H-Indene, 1,3-dimethyl-                              | 0.21                       |
| Naphthalene                                           | 2.43                       |
| 1H-Indene, 2,3-dimethyl-                              | 0.17                       |
| Naphthalene, 1-methyl-                                | 1.23                       |
| Naphthalene, 2,7-dimethyl-                            | 0.29                       |
| Naphthalene, 1,6,7-trimethyl-                         | 0.17                       |
| 1H-Phenylene                                          | 0.21                       |
| <b>Phenol derivatives</b>                             | <b>0.26</b>                |
| Phenol, 3-methyl-                                     | 0.26                       |

|                                                                |              |
|----------------------------------------------------------------|--------------|
| <b>Saturated aliphatic hydrocarbons</b>                        | <b>4.16</b>  |
| Cyclohexane, 1,2,3-trimethyl-                                  | 0.20         |
| Cyclopentane, 2-ethyl-1,1-dimethyl                             | 0.35         |
| Cyclohexane, 1,2-dimethyl-3-pentyl-4-propyl-                   | 2.49         |
| Octadecane                                                     | 0.21         |
| Cyclopentadecane                                               | 0.18         |
| Cyclotetradecane, 1,7,11-trimethyl-4-(1-methylethyl)-          | 0.73         |
| <b>Unsaturated aliphatic hydrocarbons</b>                      | <b>11.17</b> |
| 1-Heptene                                                      | 0.41         |
| 1-Undecene                                                     | 1.51         |
| 2-Pentene, 3-methyl-                                           | 0.20         |
| 1,3,5-Hexatriene, 2-methyl-                                    | 0.22         |
| 1-Decene                                                       | 0.66         |
| 2-Octene                                                       | 0.17         |
| 1-Tridecene                                                    | 1.21         |
| 8-Hexadecyne                                                   | 0.50         |
| Guaia-1,11-diene                                               | 0.16         |
| 1-Nonadecene                                                   | 1.23         |
| Cyclohexane, 1,1-dimethyl-2,4-bis(1-methylethenyl)-            | 0.25         |
| 2,6,10,14-Tetramethyl-7-(3-methylpent-4-enylidene) pentadecane | 4.65         |
| <b>Cycloxygenated organics</b>                                 | <b>2.25</b>  |
| Cyclopentanone, 2,2-dimethyl-                                  | 0.56         |
| 2-Cyclopenten-1-one, 2-methyl-                                 | 0.63         |
| 2-Cyclopenten-1-one, 2-hydroxy-3-methyl-                       | 0.45         |
| 2-Cyclohexen-1-ol                                              | 0.27         |
| 2-Cyclopenten-1-one, 2,3-dimethyl-                             | 0.34         |
| <b>Others</b>                                                  | <b>2.19</b>  |
| 1-Nonanol                                                      | 0.88         |
| 2(1H)-Naphthalenone, octahydro-4,7,7-trimethyl-                | 0.31         |
| Nonahexacontanoic acid                                         | 0.57         |
| 1-Undecanol                                                    | 0.43         |
| <b>Total</b>                                                   | <b>42.34</b> |

**Table S7. Composition of bio-oil obtained from experiment E2 on moisture free basis.**

| <b>Product</b>                           | <b>Composition (area%)</b> |
|------------------------------------------|----------------------------|
| <b>Furan derivatives</b>                 | <b>0.65</b>                |
| Furan, 2,5-dimethyl-                     | 0.32                       |
| 3-Furaldehyde                            | 0.33                       |
| <b>Single ring aromatic hydrocarbons</b> | <b>17.77</b>               |
| Benzene                                  | 1.76                       |
| Toluene                                  | 4.90                       |
| Ethylbenzene                             | 1.36                       |
| P-Xylene                                 | 4.63                       |
| Benzene, propyl-                         | 0.09                       |
| Benzene, 1-ethyl-3-methyl-               | 3.52                       |
| Benzene, 1,2,3-trimethyl-                | 0.18                       |
| Benzene, 1-ethyl-2,3-dimethyl-           | 0.42                       |
| Benzene, (2-methyl-1-propenyl)-          | 0.13                       |
| Benzene, pentyl-                         | 0.43                       |
| P-Cymene                                 | 0.35                       |
| <b>Polycyclic aromatic hydrocarbons</b>  | <b>6.55</b>                |
| Indane                                   | 0.72                       |
| 1H-Indene, 2,3-dihydro-1,3-dimethyl-     | 0.09                       |
| Naphthalene                              | 2.87                       |
| 1H-Indene, 1-ethenyl-2,3-dihydro-        | 0.14                       |
| 1H-Indene, 1,3-dimethyl-                 | 0.20                       |
| Naphthalene, 2-methyl-                   | 2.07                       |
| Naphthalene, 2,7-dimethyl-               | 0.14                       |
| Naphthalene, 1-propyl-                   | 0.13                       |
| 1-Isopropenylnaphthalene                 | 0.11                       |
| 9H-Fluorene, 2,3-dimethyl-               | 0.08                       |
| <b>Phenol derivatives</b>                | <b>0.00</b>                |
| <b>Saturated aliphatic hydrocarbons</b>  | <b>3.22</b>                |
| Cycloheptane                             | 0.12                       |
| Heptane                                  | 0.35                       |
| Heptane, 2-methyl-                       | 0.28                       |
| Heptane, 2,4-dimethyl-                   | 0.59                       |
| Octane, 2,6-dimethyl-                    | 0.10                       |
| Decane                                   | 0.11                       |
| Undecane                                 | 0.18                       |
| Cycloundecane, 1,1,2-trimethyl-          | 0.10                       |
| 4-Tetradecene                            | 0.16                       |



|                                                                |              |
|----------------------------------------------------------------|--------------|
| Cyclopentadecane                                               | 0.12         |
| Cyclopentane, 1-butyl-2-pentyl-                                | 0.11         |
| Cyclohexane, (2,2-dimethylcyclopentyl)-                        | 0.11         |
| Cyclohexane, 1,2-dimethyl-3-pentyl-4-propyl-                   | 0.40         |
| Cyclotetradecane, 1,7,11-trimethyl-4-(1-methylethyl)-          | 0.26         |
| Hexadecane, 7,9-dimethyl-                                      | 0.12         |
| Octadecane                                                     | 0.11         |
| <b>Unsaturated aliphatic hydrocarbons</b>                      | <b>4.11</b>  |
| 3-Vinyl-1-cyclobutene                                          | 0.24         |
| 1,3-Cyclopentadiene, 5-methyl-                                 | 0.10         |
| Cyclopentene, 1-methyl-                                        | 0.13         |
| 1,3-Cyclohexadiene                                             | 0.31         |
| 1-Heptene                                                      | 0.34         |
| 2,4-Heptadiene                                                 | 0.17         |
| 1-Butene, 3,3-dimethyl-                                        | 0.13         |
| 1,3,5-Hexatriene, 3-methyl                                     | 0.21         |
| 2,4-Hexadiene, 3-methyl-                                       | 0.13         |
| 1-Heptene, 2-methyl-                                           | 0.58         |
| 1-Octene                                                       | 0.35         |
| 3-Octene                                                       | 0.09         |
| 1-Nonene                                                       | 0.38         |
| 3-Undecene                                                     | 0.10         |
| 5-Undecene                                                     | 0.10         |
| Tricycloundec-9-ene,2,6,6,9-tetramethyl-                       | 0.09         |
| 8-Hexadecyne                                                   | 0.16         |
| Cyclobutane, (1-methylethylidene)-                             | 0.26         |
| 2,6,10,14-Tetramethyl-7-(3-methylpent-4-enylidene) pentadecane | 0.24         |
| <b>Cyclo oxygenated organics</b>                               | <b>0.00</b>  |
| <b>Others</b>                                                  | <b>0.08</b>  |
| 1-Heptanol, 3-methyl-                                          | 0.08         |
| <b>Total</b>                                                   | <b>32.38</b> |

**Table S8. Composition of bio-oil obtained from experiment E3 on moisture free basis.**

| <b>Product</b>               | <b>Composition (area%)</b> |
|------------------------------|----------------------------|
| <b>Furan derivatives</b>     | <b>5.95</b>                |
| Furan, 2,5-dimethyl-         | 0.65                       |
| Furan, 2,3-dihydro-3-methyl- | 0.11                       |
| Furfural                     | 3.48                       |
| 2-Furanmethanol              | 0.13                       |

|                                              |              |
|----------------------------------------------|--------------|
| Ethanone, 1-(2-furanyl)-                     | 0.25         |
| 2-Furancarboxaldehyde, 5-methyl-             | 1.21         |
| Benzofuran, 2-methyl-                        | 0.12         |
| <b>Single ring aromatic hydrocarbons</b>     | <b>7.09</b>  |
| Benzene                                      | 1.78         |
| Toluene                                      | 3.68         |
| Ethylbenzene                                 | 0.19         |
| Benzene, 1,3-dimethyl-                       | 1.11         |
| Benzene, 1-ethyl-2-methyl-                   | 0.23         |
| Benzene, 1,2,4-trimethyl-                    | 0.10         |
| <b>Polycyclic aromatic hydrocarbons</b>      | <b>1.77</b>  |
| Indene                                       | 0.53         |
| 1H-Indene, 1-methylene-                      | 0.15         |
| Naphthalene                                  | 0.38         |
| 2-Methylindene                               | 0.15         |
| 1H-Indene, 1,3-dimethyl-                     | 0.25         |
| Naphthalene, 1-methyl-                       | 0.19         |
| Naphthalene, decahydro-2,3-dimethyl-         | 0.12         |
| <b>Phenol derivatives</b>                    | <b>1.59</b>  |
| Phenol, 2-methyl-                            | 0.18         |
| Phenol                                       | 0.10         |
| P-Cresol                                     | 1.04         |
| Phenol, 2,4-dimethyl-                        | 0.18         |
| Phenol, 3-ethyl-                             | 0.09         |
| <b>Saturated aliphatic hydrocarbons</b>      | <b>1.46</b>  |
| Bicyclooctane, 2-methyl-                     | 0.10         |
| Cyclodecane                                  | 0.26         |
| Cyclopentane, propyl-                        | 0.19         |
| Cyclopropane, 1-ethyl-1-methyl-              | 0.12         |
| Cyclopentane, 3-hexyl-1,1-dimethyl           | 0.12         |
| Dodecane, 2,6,10-trimethyl-                  | 0.10         |
| Bicyclooctane                                | 0.13         |
| Cyclohexane, 1,2-dimethyl-3-pentyl-4-propyl- | 0.34         |
| Cyclohexane, (2,2-dimethylcyclopentyl)-      | 0.10         |
| <b>Unsaturated aliphatic hydrocarbons</b>    | <b>11.24</b> |
| 1-Cyclobutyl cyclobutene                     | 0.19         |
| 1,4-Hexadiene                                | 0.14         |
| 2-Hexen-4-ene                                | 0.27         |
| 1,3-Cyclopentadiene, 5,5-dimethyl-           | 0.34         |
| 5-Methyl-2-hexene                            | 0.24         |
| 1-Heptene                                    | 0.70         |

|                                                                |              |
|----------------------------------------------------------------|--------------|
| 2-Butene, 2,3-dimethyl-                                        | 0.20         |
| 1,3-Cyclopentadiene, 1,2-dimethyl-                             | 0.12         |
| 1-Octene                                                       | 0.64         |
| Cyclohexene, 1,2-dimethyl-                                     | 0.20         |
| 1-Nonene                                                       | 0.13         |
| 2-Heptene                                                      | 0.71         |
| 1-Decene                                                       | 0.60         |
| 1-Isopropylcyclohex-1-ene                                      | 0.12         |
| D-Limonene                                                     | 0.19         |
| 2-Decene, 8-methyl-                                            | 0.14         |
| 1-Dodecene                                                     | 0.70         |
| 17-Pentatriacontene                                            | 0.13         |
| 1-Tridecene                                                    | 0.79         |
| 7-Tetradecyne                                                  | 0.21         |
| 6-Dodecene                                                     | 0.19         |
| 2-Tetradecene                                                  | 0.36         |
| 1-Undecene                                                     | 1.22         |
| 5-Octadecene                                                   | 0.33         |
| 1,3,5,7-Cyclooctatetraene                                      | 0.56         |
| 3-Undecene, 9-methyl-                                          | 0.44         |
| 8-Heptadecene                                                  | 0.18         |
| 5-Octadecene                                                   | 0.23         |
| 9-Octadecene                                                   | 0.10         |
| 1-Docosene                                                     | 0.11         |
| 7-Hexadecyne                                                   | 0.24         |
| 1-Hexadecyne                                                   | 0.10         |
| 17-Pentatriacontene                                            | 0.10         |
| Bicyclononane, 3-methylene-                                    | 0.10         |
| 2,6,10,14-Tetramethyl-7-(3-methylpent-4-enylidene) pentadecane | 0.22         |
| <b>Cycloxygenated organics</b>                                 | <b>0.76</b>  |
| Cyclopentanone                                                 | 0.15         |
| 2-Cyclopenten-1-one, 3-methyl-                                 | 0.52         |
| 1,2-Cyclopentanedione, 3-methyl-                               | 0.09         |
| <b>Others</b>                                                  | <b>0.92</b>  |
| 2-Butanone, 3-methyl-                                          | 0.20         |
| 1,2-Ethandiol, diacetate                                       | 0.39         |
| 14-Methyl-8-hexadecyn-1-ol                                     | 0.10         |
| 1H-Inden-1-one, 2,3-dihydro-3,4,7-trimethyl-                   | 0.23         |
| <b>Total</b>                                                   | <b>30.78</b> |

**Table S9. Composition of bio-oil obtained from experiment E4 on moisture free basis.**

| <b>Product</b>                                        | <b>Composition (area%)</b> |
|-------------------------------------------------------|----------------------------|
| <b>Furan derivatives</b>                              | <b>0.69</b>                |
| Furan, 2,5-dimethyl-                                  | 0.11                       |
| Furfural                                              | 0.58                       |
| <b>Single ring aromatic hydrocarbons</b>              | <b>12.38</b>               |
| Benzene                                               | 2.15                       |
| Toluene                                               | 4.46                       |
| Ethylbenzene                                          | 0.69                       |
| P-Xylene                                              | 1.11                       |
| Styrene                                               | 2.33                       |
| Benzene, propyl-                                      | 0.19                       |
| Benzene, 1-ethyl-3-methyl-                            | 0.68                       |
| Benzene, 1,2,4-trimethyl-                             | 0.22                       |
| 1-Propyne, 3-phenyl-                                  | 0.34                       |
| Benzene, 1,2-diethyl-                                 | 0.21                       |
| <b>Polycyclic aromatic hydrocarbons</b>               | <b>7.65</b>                |
| Indene                                                | 1.06                       |
| 1H-Indene, 1,3-dimethyl-                              | 0.15                       |
| Naphthalene                                           | 3.82                       |
| Naphthalene, 2-methyl-                                | 1.17                       |
| Naphthalene, 2-ethenyl-                               | 0.18                       |
| Naphthalene, 1,4-dimethyl-                            | 0.08                       |
| Biphenylene                                           | 0.63                       |
| Naphthalene, 1,4,5-trimethyl-                         | 0.07                       |
| 3,3'-Dimethylbiphenyl                                 | 0.06                       |
| 9H-Fluorene, 2-methyl-                                | 0.06                       |
| Stilbene                                              | 0.08                       |
| Pyrene                                                | 0.22                       |
| Phenanthrene                                          | 0.07                       |
| <b>Phenol derivatives</b>                             | <b>0.15</b>                |
| Phenol                                                | 0.15                       |
| <b>Saturated aliphatic hydrocarbons</b>               | <b>2.09</b>                |
| Cyclopropane, pentyl-                                 | 0.11                       |
| Cyclopropane, 1-methyl-2-pentyl-                      | 0.41                       |
| 7-Formylbicycloheptane                                | 0.11                       |
| Bicyclooctane, 2-methyl-                              | 0.09                       |
| Cyclotetradecane, 1,7,11-trimethyl-4-(1-methylethyl)- | 0.31                       |
| Cyclohexane, 1,2-dimethyl-3-pentyl-4-propyl-          | 0.77                       |

|                                                                |              |
|----------------------------------------------------------------|--------------|
| Bicycloheptane, 2,6,6-trimethyl-                               | 0.08         |
| 1-Methylbicyclooctane                                          | 0.10         |
| Cyclohexane, (2,2-dimethylcyclopentyl)-                        | 0.11         |
| <b>Unsaturated aliphatic hydrocarbons</b>                      | <b>2.32</b>  |
| 4-Methylenecyclopentene                                        | 0.07         |
| 1,3-Cyclopentadiene, 5-methyl-                                 | 0.09         |
| 1-Heptene                                                      | 0.17         |
| 1,3,5-Hexatriene, 3-methyl-                                    | 0.10         |
| 1-Heptene, 2-methyl-                                           | 0.29         |
| 1-Octene                                                       | 0.27         |
| Cyclohexene, 1,4-dimethyl-                                     | 0.07         |
| 1-Decene                                                       | 0.28         |
| 1-Tridecyne                                                    | 0.06         |
| 1-Dodecene                                                     | 0.08         |
| 3-Eicosene                                                     | 0.07         |
| 1-Nonadecene                                                   | 0.07         |
| 7-Tetradecyne                                                  | 0.09         |
| 5-Nonadecene                                                   | 0.11         |
| Cyclopentane, 1,3-bis(methylene)-                              | 0.09         |
| 2,6,10,14-Tetramethyl-7-(3-methylpent-4-enylidene) pentadecane | 0.41         |
| <b>Cycloxygenated organics</b>                                 | <b>0.07</b>  |
| 2-Cyclopenten-1-one, 2,3-dimethyl-                             | 0.07         |
| <b>Others</b>                                                  | <b>0.79</b>  |
| 1-Undecanol                                                    | 0.05         |
| N-Tridecan-1-ol                                                | 0.37         |
| 1-Tetradecanol                                                 | 0.17         |
| Heptacosyl acetate                                             | 0.07         |
| N-Tetracosanol-1                                               | 0.13         |
| <b>Total</b>                                                   | <b>26.14</b> |

**Table S10. Composition of bio-oil obtained from experiment E5 on moisture free basis.**

| <b>Product</b>                           | <b>Composition (area%)</b> |
|------------------------------------------|----------------------------|
| <b>Furan derivatives</b>                 | <b>2.21</b>                |
| Furan, 2,5-dimethyl-                     | 0.78                       |
| Furfural                                 | 1.26                       |
| Ethanone, 1-(2-furanyl)-                 | 0.17                       |
| <b>Single ring aromatic hydrocarbons</b> | <b>19.05</b>               |
| Benzene                                  | 3.77                       |
| Toluene                                  | 7.32                       |

|                                                       |             |
|-------------------------------------------------------|-------------|
| Ethylbenzene                                          | 1.31        |
| P-Xylene                                              | 1.65        |
| Styrene                                               | 2.64        |
| Benzene, propyl-                                      | 0.17        |
| Benzene, 1-ethyl-4-methyl-                            | 1.68        |
| Mesitylene                                            | 0.17        |
| Benzene, pentyl-                                      | 0.17        |
| Benzene, (1,2-dimethyl-1-propenyl)                    | 0.17        |
| <b>Polycyclic aromatic hydrocarbons</b>               | <b>7.16</b> |
| Indene                                                | 1.13        |
| 1H-Indene, 1-methylene-                               | 0.65        |
| 2-Methylindene                                        | 0.84        |
| Naphthalene                                           | 2.79        |
| 1H-Indene, 4,7-dimethyl-                              | 0.25        |
| 1,2,3-Trimethylindene                                 | 0.14        |
| Naphthalene, 2-methyl-                                | 0.63        |
| Naphthalene, 2,3-dimethyl-                            | 0.34        |
| 9H-Fluorene, 2-methyl-                                | 0.15        |
| Anthracene                                            | 0.24        |
| <b>Phenol derivatives</b>                             | <b>0.00</b> |
| <b>Saturated aliphatic hydrocarbons</b>               | <b>2.38</b> |
| Cis-1-Butyl-2-methylcyclopropane                      | 0.71        |
| 9-Methylbicyclononane                                 | 0.13        |
| Tetramethyl-cyclohexane                               | 0.20        |
| Cyclohexane, 1,2-dimethyl-3-pentyl-4-propyl-          | 0.95        |
| Hexadecane                                            | 0.29        |
| Cyclotetradecane, 1,7,11-trimethyl-4-(1-methylethyl)- | 0.10        |
| <b>Unsaturated aliphatic hydrocarbons</b>             | <b>9.55</b> |
| 1,3-Cyclopentadiene, 1-methyl-                        | 0.79        |
| Cyclopentene, 1-methyl-                               | 0.29        |
| 4-Methylenecyclopentene                               | 0.12        |
| 1-Heptene                                             | 0.92        |
| 2,4-Heptadiene                                        | 0.18        |
| 1,3,5-Hexatriene, 3-methyl-                           | 0.11        |
| 2,4-Hexadiene, 2-methyl-                              | 0.14        |
| 1-Heptene, 2-methyl-                                  | 0.88        |
| 1-Heptene, 2,6-dimethyl-                              | 0.56        |
| 1-Nonene                                              | 0.94        |
| 1-Decene                                              | 0.72        |
| 1-Heptene, 3-methyl-                                  | 0.13        |
| 1-Undecene                                            | 1.05        |

|                                                                |              |
|----------------------------------------------------------------|--------------|
| 1-Tridecene                                                    | 0.91         |
| 6-Dodecyne                                                     | 0.14         |
| 7-Tetradecene                                                  | 0.20         |
| 1-Pentadecyne                                                  | 0.13         |
| 7-Tetradecyne                                                  | 0.15         |
| Bicyclotridec-1-ene                                            | 0.21         |
| 8-Hexadecyne                                                   | 0.14         |
| 1-Octadecene                                                   | 0.11         |
| 1-Docosene                                                     | 0.11         |
| 1-Nonadecene                                                   | 0.14         |
| Ethylidenecyclobutane                                          | 0.31         |
| 2,6,10,14-Tetramethyl-7-(3-methylpent-4-enylidene) pentadecane | 0.17         |
| <b>Cycloxygenated organics</b>                                 | <b>0.00</b>  |
| <b>Others</b>                                                  | <b>0.74</b>  |
| 3,6-Octadien-1-ol, 3,7-dimethyl-                               | 0.16         |
| Octacosanol                                                    | 0.28         |
| 1-Heneicosanol                                                 | 0.30         |
| <b>Total</b>                                                   | <b>41.09</b> |

**Table S11. Composition of bio-oil obtained from experiment E6 on moisture free basis.**

| <b>Product</b>                           | <b>Composition (area%)</b> |
|------------------------------------------|----------------------------|
| <b>Furan derivatives</b>                 | <b>0.21</b>                |
| Furan, 2,5-dimethyl-                     | 0.11                       |
| Furfural                                 | 0.10                       |
| <b>Single ring aromatic hydrocarbons</b> | <b>9.84</b>                |
| Benzene                                  | 0.66                       |
| Toluene                                  | 6.85                       |
| P-Xylene                                 | 0.28                       |
| Benzene, propyl-                         | 0.32                       |
| Benzene, (1-methylethyl)-                | 0.08                       |
| Benzene, 1,2,3-trimethyl-                | 0.21                       |
| Benzene, 1-ethyl-2-methyl-               | 0.44                       |
| Benzene, 1-ethenyl-3-methyl-             | 0.12                       |
| Benzene, 4-ethyl-1,2-dimethyl-           | 0.08                       |
| Benzene, 1-propynyl-                     | 0.24                       |
| Benzene, 2-ethenyl-1,4-dimethyl-         | 0.08                       |
| Benzene, 1,3-diethenyl-                  | 0.11                       |
| Benzene, 1,3-diethyl-5-methyl-           | 0.11                       |
| Benzene, 1-methyl-4-butyl                | 0.13                       |

|                                             |             |
|---------------------------------------------|-------------|
| (1-Methylpenta-2,4-dienyl)benzene           | 0.13        |
| <b>Polycyclic aromatic hydrocarbons</b>     | <b>3.47</b> |
| Naphthalene                                 | 1.98        |
| 1H-Indene, 1,3-dimethyl-                    | 0.12        |
| Naphthalene, 2-methyl-                      | 0.28        |
| Naphthalene, 2,3-dimethyl-                  | 0.20        |
| Aromandendrene                              | 0.20        |
| Naphthalene, decahydro-1,2-dimethyl         | 0.25        |
| Naphthalene, decahydro-2-methyl-            | 0.11        |
| 1,1,4,5,6-pentamethyl-2,3-dihydro-1H-indene | 0.22        |
| 1-Isopropenylnaphthalene                    | 0.11        |
| <b>Phenol derivatives</b>                   | <b>0.44</b> |
| P-Cresol                                    | 0.08        |
| Phenol, 2,5-dimethyl-                       | 0.36        |
| <b>Saturated aliphatic hydrocarbons</b>     | <b>2.96</b> |
| Cyclopentane, 1,2-dimethyl-                 | 0.30        |
| 1-Nonene                                    | 1.21        |
| 2,6-Dimethyl-1,3,6-heptatriene              | 0.08        |
| 1-Decene                                    | 0.20        |
| Cyclobutane, 1,2-diethyl-, trans-           | 0.11        |
| Cyclohexane, 1,2,3-trimethyl-               | 0.28        |
| 1-Methylbicyclooctane                       | 0.13        |
| 6-Tridecane                                 | 0.11        |
| 1-Methyl-2-methylenecyclohexane             | 0.21        |
| Tricycloundecane                            | 0.07        |
| Bicycloheptane, 3-methyl-7-pentyl-          | 0.10        |
| 1-Methylbicyclooctane                       | 0.16        |
| <b>Unsaturated aliphatic hydrocarbons</b>   | <b>6.3</b>  |
| 1,3,5-Hexatriene, 2-methyl-                 | 0.54        |
| 1,4-Hexadiene, 4-methyl-                    | 0.33        |
| 1,3-Cycloheptadiene                         | 0.34        |
| Cyclohexene, 1,4-dimethyl-                  | 0.22        |
| 4,5-Nonadiene, 2-methyl-                    | 0.18        |
| 1-Hexene, 3-methyl-                         | 0.11        |
| 1-Decene                                    | 1.05        |
| 9-Octadecyne                                | 0.09        |
| 3-Vinyl-1-cyclobutene                       | 0.17        |
| 1-Pentene, 3-methyl-                        | 0.11        |
| 1,3-Cycloheptadiene                         | 0.25        |
| 2,4-Dimethyl-1-hexene                       | 0.36        |
| Cyclohexene, 1,6-dimethyl-                  | 0.08        |



|                                                     |              |
|-----------------------------------------------------|--------------|
| 5-Hexadecyne                                        | 0.21         |
| 5-Undecyne                                          | 0.14         |
| 6-Tetradecyne                                       | 0.20         |
| 6-Dodecyne                                          | 0.22         |
| 4-Decyne                                            | 0.19         |
| 1,5-Cycloundecadiene, 9-(1-methylethylidene)-       | 0.14         |
| Cyclohexene, 1,2-dimethyl-                          | 0.12         |
| 5-Eicosene                                          | 0.10         |
| Bicyclotridec-1-ene                                 | 0.11         |
| 3-Eicosene                                          | 0.28         |
| Cyclopentane, 1,2-dimethyl-3-methylene-             | 0.08         |
| Cyclopropane, 1,1-dimethyl-2-(2-methyl-2-propenyl)- | 0.09         |
| 1-Isopropenyl-3-propenylcyclopentane                | 0.11         |
| Cyclohexane, (2-ethyl-1-methyl-1-butenyl)-          | 0.22         |
| Cyclohexane, 1,5-diethenyl-2,3-dimethyl-            | 0.13         |
| Cyclohexane, 1,5-dimethyl-2,3-divinyl-              | 0.13         |
| <b>Cycloxygenated organics</b>                      | <b>0.36</b>  |
| 2-Cyclohexen-1-ol, 1-methyl-                        | 0.08         |
| 2-Cyclopenten-1-one, 2,3-dimethyl-                  | 0.28         |
| <b>Others</b>                                       | <b>0.88</b>  |
| Cis-4-Decenal                                       | 0.06         |
| 3,6-Nonadienal                                      | 0.15         |
| 1-Hydroxymethyl-2-methyl-1-cyclohexene              | 0.09         |
| 1-Undecanol                                         | 0.33         |
| 2-Ethyl-1-dodecanol                                 | 0.08         |
| N-Nonadecanol-1                                     | 0.10         |
| Oxalic acid, allyl pentadecyl ester                 | 0.07         |
| <b>Total</b>                                        | <b>24.46</b> |

**Table S12. Composition of bio-oil obtained from experiment E7 on moisture free basis.**

| <b>Product</b>                           | <b>Composition (area%)</b> |
|------------------------------------------|----------------------------|
| <b>Furan derivatives</b>                 | <b>0.30</b>                |
| 2-Furancarboxaldehyde, 5-methyl-         | 0.30                       |
| <b>Single ring aromatic hydrocarbons</b> | <b>5.82</b>                |
| Benzene                                  | 0.75                       |
| Toluene                                  | 2.07                       |
| Ethylbenzene                             | 0.20                       |
| P-Xylene                                 | 0.95                       |
| Styrene                                  | 1.33                       |

|                                           |             |
|-------------------------------------------|-------------|
| Benzene, 1-ethenyl-4-methyl-              | 0.11        |
| Benzene, 1,2,3-trimethyl-                 | 0.12        |
| Benzene, 1-methyl-4-propyl-               | 0.03        |
| Benzene, (2-methyl-1-propenyl)-           | 0.07        |
| Benzene, 1,2,4,5-tetramethyl-             | 0.03        |
| Benzene, 2-butenyl-                       | 0.03        |
| Benzene, 1-methyl-1,2-propadienyl-        | 0.13        |
| <b>Polycyclic aromatic hydrocarbons</b>   | <b>4.95</b> |
| Indene                                    | 0.70        |
| Naphthalene, 1,2-dihydro-                 | 0.05        |
| 1H-Indene, 2,3-dihydro-1,2-dimethyl-      | 0.05        |
| Naphthalene                               | 2.43        |
| 1H-Indene, 2,3-dimethyl-                  | 0.04        |
| Naphthalene, 1-methyl-                    | 1.34        |
| Naphthalene, 2,6-dimethyl-                | 0.04        |
| Naphthalene, decahydro-1,2-dimethyl-      | 0.03        |
| Biphenylene                               | 0.07        |
| Aromandendrene                            | 0.04        |
| Naphthalene, 1,6,7-trimethyl-             | 0.03        |
| 1H-Phenalene                              | 0.03        |
| Anthracene                                | 0.04        |
| Fluorene                                  | 0.06        |
| <b>Phenol derivatives</b>                 | <b>0.73</b> |
| Phenol                                    | 0.19        |
| Phenol, 2-methyl-                         | 0.23        |
| P-Cresol                                  | 0.14        |
| Phenol, 2-ethyl-                          | 0.03        |
| Phenol, 3-ethyl-                          | 0.14        |
| <b>Saturated aliphatic hydrocarbons</b>   | <b>0.18</b> |
| Bicyclooctane, 2-methyl-                  | 0.03        |
| Trans-1-Butyl-2-methylcyclopropane        | 0.05        |
| 1-Methylbicyclooctane                     | 0.05        |
| Cyclopropane, 1-butyl-2-pentyl-           | 0.05        |
| <b>Unsaturated aliphatic hydrocarbons</b> | <b>0.77</b> |
| 1-Heptene                                 | 0.04        |
| 3-Methylenecyclohexene                    | 0.03        |
| Trans-3,5-Dimethylcyclohexene             | 0.05        |
| 4-Undecene                                | 0.06        |
| 1-Tridecene                               | 0.10        |
| 5-Octadecene                              | 0.10        |
| 3-Eicosene                                | 0.06        |

|                                            |              |
|--------------------------------------------|--------------|
| 1-Tetradecyne                              | 0.06         |
| 2-Hexene                                   | 0.05         |
| 5-Decene                                   | 0.03         |
| 1,3-Cyclopentadiene, 5,5-dimethyl-2-ethyl- | 0.07         |
| 1-Pentadecyne                              | 0.05         |
| 1-Nonadecene                               | 0.04         |
| Cyclohexane, 1,3-dimethyl-2-methylene-     | 0.03         |
| <b>Cycloxygenated organics</b>             | <b>5.27</b>  |
| 2-Cyclopenten-1-one                        | 4.62         |
| 2-Cyclopenten-1-one, 2-methyl-             | 0.62         |
| 2-Cyclopenten-1-one, 2,3-dimethyl-         | 0.03         |
| <b>Others</b>                              | <b>1.27</b>  |
| 3-Penten-2-one                             | 0.08         |
| 2-Propenoic acid, 6-methylheptyl ester     | 0.05         |
| Butanoic acid, 4-hydroxy-                  | 0.04         |
| 2,6-Nonadienal                             | 0.05         |
| Benzenemethanol, 4-methyl-                 | 0.07         |
| Cyclohexanone, 3-phenyl-                   | 0.04         |
| Pyridine                                   | 0.31         |
| Pyridine, 2-methyl-                        | 0.45         |
| Pyridine, 3-methyl-                        | 0.14         |
| Pyridine, 2,3-dimethyl-                    | 0.04         |
| <b>Total</b>                               | <b>19.29</b> |

**Table S13. Composition of bio-oil obtained from experiment E8 on moisture free basis.**

| <b>Product</b>                           | <b>Composition (area%)</b> |
|------------------------------------------|----------------------------|
| <b>Furan derivatives</b>                 | <b>3.11</b>                |
| Ethanone, 1-(2-furanyl)-                 | 0.20                       |
| Furfural                                 | 2.06                       |
| 2-Furancarboxaldehyde, 5-methyl-         | 0.85                       |
| <b>Single ring aromatic hydrocarbons</b> | <b>13.09</b>               |
| Benzene                                  | 1.81                       |
| Toluene                                  | 4.95                       |
| Ethylbenzene                             | 0.76                       |
| P-Xylene                                 | 1.52                       |
| Styrene                                  | 2.86                       |
| Benzene, propyl-                         | 0.17                       |
| Mesitylene                               | 0.14                       |
| Benzene, 1-ethyl-3-methyl-               | 0.15                       |

|                                                       |              |
|-------------------------------------------------------|--------------|
| Benzene, 1-ethenyl-3-methyl-                          | 0.14         |
| 1-Propyne, 3-phenyl-                                  | 0.43         |
| Benzene, 1,3-diethyl-5-methyl-                        | 0.16         |
| <b>Polycyclic aromatic hydrocarbons</b>               | <b>10.95</b> |
| Indene                                                | 1.58         |
| 1H-Indene, 1,3-dimethyl-                              | 0.24         |
| Naphthalene                                           | 4.85         |
| 1H-Indene, 4,7-dimethyl-                              | 0.14         |
| Naphthalene, 2-methyl-                                | 1.98         |
| Naphthalene, 2-ethenyl-                               | 0.34         |
| Naphthalene, 2,3-dimethyl-                            | 0.32         |
| Alloaromadendrene                                     | 0.21         |
| 1-Isopropenylnaphthalene                              | 0.12         |
| 9H-Fluorene, 2-methyl-                                | 0.11         |
| Phenanthrene, 1,2-dihydro-                            | 0.11         |
| Phenanthrene, 9,10-dihydro-1-methyl-                  | 0.12         |
| 3H-Benz[e]indene, 2-methyl-                           | 0.23         |
| Pyrene                                                | 0.48         |
| 4,6,8-Trimethylazulene                                | 0.12         |
| <b>Phenol derivatives</b>                             | <b>0.18</b>  |
| Phenol, 3-methyl-                                     | 0.18         |
| <b>Saturated aliphatic hydrocarbons</b>               | <b>3.61</b>  |
| Cyclobutane, 1,2-diethyl-                             | 0.17         |
| 2-Methylbicyclooctane                                 | 0.11         |
| Cyclotetradecane, 1,7,11-trimethyl-4-(1-methylethyl)- | 0.74         |
| Cyclohexane, 1,2-dimethyl-3-pentyl-4-propyl-          | 1.10         |
| Cyclohexane, (2,2-dimethylcyclopentyl)-               | 0.71         |
| Hexadecane                                            | 0.21         |
| Cyclohexane, 1,2,3,5-tetraisopropyl-                  | 0.20         |
| Decane, 3,8-dimethyl-                                 | 0.37         |
| <b>Unsaturated aliphatic hydrocarbons</b>             | <b>4.6</b>   |
| 1,3-Cyclohexadiene                                    | 0.21         |
| 1-Heptene                                             | 0.24         |
| 1,3,5-Hexatriene, 2-methyl-                           | 0.18         |
| 1,3,5-Heptatriene                                     | 0.11         |
| 1-Heptene, 2-methyl-                                  | 0.20         |
| 1-Nonene                                              | 0.53         |
| 9-Octadecyne                                          | 0.13         |
| 5-Undecyne                                            | 0.14         |
| Cyclohexene, 4-(4-ethylcyclohexyl)-1-pentyl-          | 0.17         |
| 2-Methyl-Z-4-tetradecene                              | 0.16         |

|                                                                |              |
|----------------------------------------------------------------|--------------|
| 8-Hexadecyne                                                   | 0.16         |
| 17-Pentatriacontene                                            | 0.44         |
| Cyclohexane, 3,4-bis(1-methylethenyl)-1,1-dimethyl-            | 0.12         |
| 2,6,10,14-Tetramethyl-7-(3-methylpent-4-enylidene) pentadecane | 1.81         |
| <b>Cycloxygenated organics</b>                                 | <b>0.61</b>  |
| 3-Cyclohexene-1-carboxaldehyde, 1-methyl-                      | 0.16         |
| 2-Cyclopenten-1-one, 2,3-dimethyl-                             | 0.14         |
| Cyclododecanone, 2-methylene-                                  | 0.13         |
| 2-Cyclopenten-1-one, 2,3-dimethyl-                             | 0.18         |
| <b>Others</b>                                                  | <b>1.29</b>  |
| 1-Undecanol                                                    | 0.13         |
| 1-Decanol                                                      | 0.26         |
| 1-Dodecanol                                                    | 0.62         |
| Tridecanedial                                                  | 0.14         |
| Oxalic acid, cyclobutyl pentadecylester                        | 0.14         |
| <b>Total</b>                                                   | <b>37.44</b> |

**Table S14. Composition of bio-oil obtained from experiment E9 on moisture free basis.**

| <b>Product</b>                           | <b>Composition (area%)</b> |
|------------------------------------------|----------------------------|
| <b>Furan derivatives</b>                 | <b>0.63</b>                |
| Furfural                                 | 0.33                       |
| 2-Furanmethanol                          | 0.07                       |
| 2-Furancarboxaldehyde, 5-methyl-         | 0.07                       |
| Benzofuran, 2-methyl-                    | 0.16                       |
| <b>Single ring aromatic hydrocarbons</b> | <b>2.92</b>                |
| Benzene                                  | 0.44                       |
| Toluene                                  | 0.49                       |
| Ethylbenzene                             | 0.18                       |
| P-Xylene                                 | 0.12                       |
| Styrene                                  | 0.59                       |
| Benzene, propyl-                         | 0.06                       |
| Benzene, 1-ethyl-3-methyl-               | 0.62                       |
| Benzene, (2-methyl-2-propenyl)-          | 0.07                       |
| Benzene, 1-methyl-1,2-propadienyl-       | 0.32                       |
| Benzene, 1-cyclopenten-1-yl-             | 0.03                       |
| <b>Polycyclic aromatic hydrocarbons</b>  | <b>10.03</b>               |
| 1H-Indene, 1-methyl-                     | 0.24                       |
| Azulene                                  | 0.12                       |
| 1,4-Dihydronaphthalene                   | 0.29                       |

|                                           |             |
|-------------------------------------------|-------------|
| 1H-Indene, 1,3-dimethyl-                  | 0.04        |
| Naphthalene                               | 3.41        |
| Naphthalene, decahydro-1,2-dimethyl-      | 0.09        |
| Naphthalene, 1-methyl-                    | 1.77        |
| Naphthalene, 2-ethenyl-                   | 0.40        |
| Naphthalene, 1,6-dimethyl-                | 0.38        |
| Biphenylene                               | 0.66        |
| Naphthalene, 1,6,7-trimethyl-             | 0.18        |
| 1H-Phenylene                              | 0.21        |
| Fluorene                                  | 0.15        |
| 9H-Fluorene, 1-methyl-                    | 0.18        |
| Anthracene                                | 0.69        |
| Phenanthrene, 9,10-dihydro-1-methyl-      | 0.03        |
| Phenanthrene, 2-methyl-                   | 0.05        |
| Pyrene                                    | 0.30        |
| Indene                                    | 0.84        |
| <b>Phenol derivatives</b>                 | <b>0.62</b> |
| Phenol                                    | 0.20        |
| P-Cresol                                  | 0.24        |
| Phenol, 2,4-dimethyl-                     | 0.07        |
| Phenol, 4-ethyl-                          | 0.05        |
| 1,4-Benzenediol, 2,6-dimethyl-            | 0.06        |
| <b>Saturated aliphatic hydrocarbons</b>   | <b>0.16</b> |
| Cyclotetradecane                          | 0.16        |
| <b>Unsaturated aliphatic hydrocarbons</b> | <b>0.73</b> |
| 1,3,5-Hexatriene, 3-methyl-               | 0.05        |
| 1-Nonene                                  | 0.12        |
| 1-Decene                                  | 0.07        |
| 1-Undecene                                | 0.11        |
| 1-Undecene, 10-methyl-                    | 0.04        |
| 5-Tetradecene                             | 0.10        |
| 5-Dodecene                                | 0.06        |
| Bicycloundeca-1,3,5,7,9-pentaene          | 0.04        |
| 6-Tetradecyne                             | 0.14        |
| <b>Cycloxygenated organics</b>            | <b>0.06</b> |
| 2-Cyclopenten-1-one, 2-methyl-            | 0.03        |
| 1,2-Cyclopentanedione, 3-methyl-          | 0.03        |
| <b>Others</b>                             | <b>0.46</b> |
| 2,3-Butanedione                           | 0.08        |
| Benzeneethanol, .beta.-ethenyl-           | 0.06        |
| 1,4-Benzenediol, 2,6-dimethyl-            | 0.05        |

|                             |              |
|-----------------------------|--------------|
| N-Tridecan-1-ol             | 0.05         |
| Isolongifolol, methyl ether | 0.08         |
| Pyridine                    | 0.08         |
| Pyridine, 2-methyl-         | 0.06         |
| <b>Total</b>                | <b>15.61</b> |

**Table S15. Composition of bio-oil obtained from experiment E10 on moisture free basis.**

| <b>Product</b>                           | <b>Composition (area%)</b> |
|------------------------------------------|----------------------------|
| <b>Furan derivatives</b>                 | <b>10.73</b>               |
| Furan, 2,5-dimethyl-                     | 1.64                       |
| Furan, 2-ethyl-5-methyl-                 | 0.33                       |
| 3-Furaldehyde                            | 0.14                       |
| Ethanone, 1-(2-furanyl)-                 | 0.80                       |
| 2-Furancarboxaldehyde, 5-methyl-         | 1.68                       |
| Benzofuran, 4,7-dimethyl-                | 0.19                       |
| Furfural                                 | 5.95                       |
| <b>Single ring aromatic hydrocarbons</b> | <b>13.75</b>               |
| Benzene                                  | 1.68                       |
| Toluene                                  | 5.13                       |
| P-Xylene                                 | 1.91                       |
| Styrene                                  | 2.65                       |
| Benzene, propyl-                         | 0.19                       |
| Mesitylene                               | 0.64                       |
| Benzene, 1,2,3-trimethyl-                | 0.13                       |
| Benzene, 1-ethenyl-3-methyl-             | 0.32                       |
| Benzene, 1-ethynyl-4-methyl-             | 0.64                       |
| Benzene, 1-ethyl-2,4,5-trimethyl-        | 0.15                       |
| Benzene, (1-ethylpropyl)-                | 0.18                       |
| (1-Methylpenta-2,4-dienyl)benzene        | 0.13                       |
| <b>Polycyclic aromatic hydrocarbons</b>  | <b>5.79</b>                |
| Indene                                   | 0.83                       |
| 1H-Indene, 1-methyl-                     | 0.13                       |
| 1H-Indene, 1,3-dimethyl-                 | 0.53                       |
| Naphthalene                              | 2.70                       |
| 1H-Indene, 4,7-dimethyl-                 | 0.24                       |
| Naphthalene, decahydro-2-methyl-         | 0.16                       |
| Naphthalene, 2-methyl-                   | 0.74                       |
| Naphthalene, 2-ethenyl-                  | 0.22                       |
| Naphthalene, 1,6,7-trimethyl-            | 0.24                       |

|                                                  |             |
|--------------------------------------------------|-------------|
| <b>Phenol derivatives</b>                        | <b>0.32</b> |
| P-Cresol                                         | 0.20        |
| Phenol, 4-ethyl-2-methoxy-                       | 0.12        |
| <b>Saturated aliphatic hydrocarbons</b>          | <b>1.81</b> |
| Cyclopentane, 1,3-dimethyl-                      | 0.29        |
| 1-Methylbicyclooctane                            | 0.14        |
| Bicyclooctane, 2-methyl-                         | 0.31        |
| 6-Tridecane                                      | 0.33        |
| Cyclodecane, methyl-                             | 0.12        |
| Heptane, 3,4-dimethyl-                           | 0.12        |
| Trans-Pinane                                     | 0.24        |
| Tricyclodecane, 4-methyl-                        | 0.13        |
| Tricyclononane, 2,2,5,5,8,8-hexamethyl-          | 0.13        |
| <b>Unsaturated aliphatic hydrocarbons</b>        | <b>8.37</b> |
| 1,3-Cyclohexadiene                               | 0.16        |
| 1-Pentene, 2-methyl-                             | 0.41        |
| 1-Heptene                                        | 0.50        |
| 1,3,5-Hexatriene, 2-methyl-                      | 0.17        |
| 2,4-Hexadiene, 2-methyl-                         | 0.17        |
| 1-Heptene, 2-methyl-                             | 0.96        |
| 1-Octene                                         | 0.75        |
| 1-Heptene, 2,6-dimethyl-                         | 0.51        |
| 1-Nonene                                         | 0.81        |
| 1-Decene                                         | 0.62        |
| 1-Decene, 9-methyl-                              | 0.21        |
| Cyclohexene, 1-butyl-                            | 0.26        |
| 6-Dodecyne                                       | 0.15        |
| 1-Undecene                                       | 0.94        |
| 9-Octadecyne                                     | 0.17        |
| 2,7-Octadiene, 4-methyl-                         | 0.15        |
| Bicyclotridec-1-ene                              | 0.30        |
| 3,4-Octadiene, 7-methyl-                         | 0.17        |
| 3-Eicosene                                       | 0.38        |
| Tetradecyne                                      | 0.14        |
| 1-Octadecyne                                     | 0.14        |
| Cyclohexane, 1,5-diethenyl-2,3-dimethyl-         | 0.18        |
| Cyclohexane, 1,5-dimethyl-2,3-divinyl-           | 0.12        |
| <b>Cycloxygenated organics</b>                   | <b>0.96</b> |
| 3-Cyclohexene-1-carboxaldehyde, 1,3,4-trimethyl- | 0.14        |
| 2-Cyclopenten-1-one, 2-methyl-                   | 0.82        |
| <b>Others</b>                                    | <b>2.79</b> |



|                                                       |              |
|-------------------------------------------------------|--------------|
| 3-Buten-2-one, 3-methyl-                              | 0.71         |
| 2-Propanone, 1-(acetyloxy)-                           | 0.25         |
| Benzenemethanol, 4-methyl-                            | 0.33         |
| 1-Undecanol                                           | 0.15         |
| N-Heptadecanol-1                                      | 0.19         |
| Decan-2-one                                           | 0.14         |
| 1-Dodecanol                                           | 0.38         |
| 3-Buten-2-one, 4-(2,6,6-trimethyl-1-cyclohexen-1-yl)- | 0.20         |
| 1-Hexacosanol                                         | 0.14         |
| N-Tetracosanol-1                                      | 0.18         |
| Octacosanol                                           | 0.12         |
| <b>Total</b>                                          | <b>44.52</b> |

**Table S16. Selectivity of light gases obtained from microwave pyrolysis of 20 g of MSW-A at microwave power of 450 W and different MSW:graphite ratios (wt./wt).**

| <b>Compound</b>   | <b>20:1</b> | <b>5:1</b> | <b>1:1</b> | <b>1:2</b> |
|-------------------|-------------|------------|------------|------------|
| Methane           | 14.89       | 12.75      | 13.64      | 1.41       |
| Ethylene          | 8.49        | 12.86      | 7.45       | 0          |
| Ethane            | 7.19        | 5.62       | 7.06       | 21.48      |
| Propylene         | 8.1         | 10.16      | 7.20       | 0.9        |
| Propane           | 2.21        | 1.02       | 2.42       | 0          |
| Propadiene        | 0           | 0          | 0.00       | 3.64       |
| $\Sigma$ C1-C3    | 40.88       | 42.41      | 37.77      | 27.43      |
| Isobutane         | 0.13        | 0.06       | 0.14       | 0          |
| Isobutene         | 2.91        | 3.19       | 0.00       | 2.22       |
| 1,3-Butadiene     | 0           | 0          | 2.76       | 1.21       |
| n-Butane          | 0.45        | 0.08       | 1.08       | 2.15       |
| cis-2-Butene      | 0.46        | 0.44       | 0.48       | 0          |
| n-Pentane         | 0.19        | 0.25       | 0.24       | 0          |
| 2-Methyl-2-butene | 0.88        | 0.78       | 0.77       | 1.78       |
| $\Sigma$ C4-C5    | 5.02        | 4.80       | 5.47       | 7.36       |
| H <sub>2</sub>    | 41.70       | 40.83      | 24.88      | 46.90      |
| O <sub>2</sub>    | 4.06        | 7.145      | 6.39       | 1.27       |
| CO <sub>2</sub>   | 3.87        | 1.41       | 1.18       | 1.71       |

The selectivity of CO was less than 1% in all the experiments.

**Table S17. Composition of bio-oil obtained from experiment E11 on moisture free basis.**

| <b>Product</b>                                        | <b>Composition (area%)</b> |
|-------------------------------------------------------|----------------------------|
| <b>Furan derivatives</b>                              | <b>3.40</b>                |
| Furfural                                              | 2.37                       |
| 3-Furanmethanol                                       | 0.10                       |
| 2-Furancarboxaldehyde, 5-methyl-                      | 0.67                       |
| Benzofuran, 2-methyl-                                 | 0.09                       |
| Benzofuran, 2,3-dihydro-                              | 0.17                       |
| <b>Single ring aromatic hydrocarbons</b>              | <b>12.37</b>               |
| Benzene                                               | 3.75                       |
| Toluene                                               | 4.54                       |
| Ethylbenzene                                          | 0.34                       |
| P-Xylene                                              | 1.24                       |
| Styrene                                               | 1.61                       |
| Benzene, propyl-                                      | 0.80                       |
| O-Cymene                                              | 0.09                       |
| <b>Polycyclic aromatic hydrocarbons</b>               | <b>4.90</b>                |
| Indene                                                | 0.75                       |
| 2-Methyl indene                                       | 0.27                       |
| Naphthalene                                           | 1.63                       |
| 1H-Indene, 1,3-dimethyl-                              | 0.15                       |
| Naphthalene, 2-methyl-                                | 2.10                       |
| <b>Phenol derivatives</b>                             | <b>1.27</b>                |
| Phenol                                                | 0.78                       |
| Phenol, 3-methyl-                                     | 0.11                       |
| Phenol, 3,5-dimethyl-                                 | 0.14                       |
| Trans-Isoeugenol                                      | 0.12                       |
| Creosol                                               | 0.12                       |
| <b>Saturated aliphatic hydrocarbons</b>               | <b>3.63</b>                |
| Cyclopropane, 1-butyl-2-pentyl-                       | 0.13                       |
| Cyclopentane, 3-hexyl-1,1-dimethyl                    | 0.09                       |
| Cyclotetradecane, 1,7,11-trimethyl-4-(1-methylethyl)- | 0.20                       |
| Cyclopentane, 1-butyl-2-pentyl-                       | 0.31                       |
| Cyclohexane, 1,2-dimethyl-3-pentyl-4-propyl-          | 2.90                       |
| <b>Unsaturated aliphatic hydrocarbons</b>             | <b>9.10</b>                |
| 1-Heptene                                             | 0.23                       |
| 1-Octene                                              | 0.30                       |
| 3-Octyne                                              | 0.10                       |
| 1-Decene                                              | 0.55                       |

|                                                                |              |
|----------------------------------------------------------------|--------------|
| D-Limonene                                                     | 0.30         |
| 1-Undecene                                                     | 0.89         |
| Cyclooctene, 3-(1-methylethenyl)-                              | 0.09         |
| 1-Decene                                                       | 0.55         |
| Cycloundecene, 1-methyl-                                       | 0.10         |
| Cyclohexene, 1,2-dimethyl-                                     | 0.09         |
| 4-Nonene, 2-methyl-                                            | 0.10         |
| 5-Dodecyne                                                     | 0.11         |
| 1-Nonadecene                                                   | 0.79         |
| 5-Octadecene                                                   | 0.27         |
| 1-Nonene                                                       | 0.09         |
| 1-Hexacosene                                                   | 0.35         |
| 2,6,10,14-Tetramethyl-7-(3-methylpent-4-enylidene) pentadecane | 4.19         |
| <b>Cyclooxxygenated organics</b>                               | <b>0.30</b>  |
| 2-Cyclopenten-1-one, 2-methyl-                                 | 0.18         |
| 1,2-Cyclopentanedione, 3-methyl-                               | 0.12         |
| <b>Others</b>                                                  | <b>0.48</b>  |
| Pyridine                                                       | 0.09         |
| 1,2-Ethanediol, diacetate                                      | 0.39         |
| <b>Total</b>                                                   | <b>35.45</b> |

**Table S18. Composition of bio-oil obtained from experiment E12 on moisture free basis.**

| <b>Product</b>                                | <b>Composition (area%)</b> |
|-----------------------------------------------|----------------------------|
| <b>Furan derivatives</b>                      | <b>7.66</b>                |
| Furan, 2,3-dihydro-3-methyl-                  | 0.29                       |
| Furfural                                      | 5.52                       |
| Ethanone, 1-(2-furanyl)-                      | 0.46                       |
| 2-Furancarboxaldehyde, 5-methyl-              | 1.14                       |
| Benzofuran, 2-methyl-                         | 0.25                       |
| <b>Single ring aromatic hydrocarbons</b>      | <b>9.76</b>                |
| Benzene                                       | 2.31                       |
| Toluene                                       | 4.45                       |
| Ethylbenzene                                  | 0.17                       |
| Benzene, 1,3-dimethyl-                        | 1.48                       |
| Benzene, 1-ethenyl-4-methyl-                  | 1.04                       |
| Benzene, (1-methyl-2-cyclopropen-1-yl)-       | 0.17                       |
| Benzene, 1-(1,5-dimethyl-4-hexenyl)-4-methyl- | 0.14                       |
| <b>Polycyclic aromatic hydrocarbons</b>       | <b>4.00</b>                |
| Naphthalene                                   | 1.54                       |

|                                                                |              |
|----------------------------------------------------------------|--------------|
| 1H-Indene, 1,3-dimethyl-                                       | 0.30         |
| Naphthalene, 2-methyl-                                         | 1.04         |
| Naphthalene, 1,2,3,4-tetrahydro-1,1,6-trimethyl-               | 0.27         |
| Naphthalene, 1,6,7-trimethyl-                                  | 0.31         |
| Naphthalene, 1-methyl-7-(1-methylethyl)-                       | 0.31         |
| 1,4,5,8-Tetramethylnaphthalene                                 | 0.23         |
| <b>Phenol derivatives</b>                                      | <b>4.21</b>  |
| Phenol, 2-methyl-                                              | 0.14         |
| Phenol                                                         | 1.51         |
| P-Cresol                                                       | 2.14         |
| Phenol, 2-methoxy-5-(1-propenyl)-                              | 0.21         |
| Trans-Isoeugenol                                               | 0.21         |
| <b>Saturated aliphatic hydrocarbons</b>                        | <b>7.96</b>  |
| Cyclodecane                                                    | 0.19         |
| Hexadecane                                                     | 1.54         |
| Cyclohexane, 1,2-dimethyl-3-pentyl-4-propyl-                   | 4.58         |
| Cyclopentane, (2-hexyloctyl)-                                  | 0.29         |
| Heptadecane, 3-methyl-                                         | 0.45         |
| Heptadecane                                                    | 0.46         |
| Eicosane                                                       | 0.45         |
| <b>Unsaturated aliphatic hydrocarbons</b>                      | <b>15.28</b> |
| 1-Heptene                                                      | 0.74         |
| 1-Octene                                                       | 0.33         |
| Cyclohexene, 1,2-dimethyl-                                     | 0.15         |
| 1,3,5,7-Cyclooctatetraene                                      | 0.68         |
| Cyclohexene, 1-methyl-4-(1-methylethenyl)-                     | 0.21         |
| 1-Decene                                                       | 0.43         |
| 9-Octadecene                                                   | 0.30         |
| 5-Tetradecene                                                  | 0.19         |
| 1-Nonadecene                                                   | 3.67         |
| 2,6,10,14-Tetramethyl-7-(3-methylpent-4-enylidene) pentadecane | 8.58         |
| <b>Cycloxygenated organics</b>                                 | <b>2.30</b>  |
| Cyclopentanone                                                 | 0.16         |
| 2-Cyclopenten-1-one, 2-methyl-                                 | 1.60         |
| 1,2-Cyclopentanedione, 3-methyl-                               | 0.18         |
| 2-Cyclopenten-1-one, 2,3-dimethyl-                             | 0.36         |
| <b>Others</b>                                                  | <b>1.84</b>  |
| 3-Hexanone                                                     | 0.13         |
| 2-Propanone, 1-(acetyloxy)-                                    | 0.73         |
| 2(1H)-Naphthalenone, octahydro-4,7,7-trimethyl-                | 0.13         |
| 1-Decanol, 2-hexyl-                                            | 0.38         |

|                 |              |
|-----------------|--------------|
| Behenic alcohol | 0.47         |
| <b>Total</b>    | <b>53.01</b> |

**Table S19. Composition of bio-oil obtained from experiment E13 on moisture free basis.**

| <b>Product</b>                                | <b>Composition<br/>(area%)</b> |
|-----------------------------------------------|--------------------------------|
| <b>Furan derivatives</b>                      | <b>6.05</b>                    |
| Furan, 2,5-dimethyl-                          | 1.38                           |
| 2-Furancarboxaldehyde, 5-methyl-              | 4.37                           |
| Benzofuran                                    | 0.30                           |
| <b>Single ring aromatic hydrocarbons</b>      | <b>22.37</b>                   |
| Benzene                                       | 6.39                           |
| Toluene                                       | 10.06                          |
| Ethylbenzene                                  | 1.25                           |
| p-Xylene                                      | 1.16                           |
| Benzene, 1,2,4-trimethyl-                     | 0.49                           |
| Benzene, 1,2,4,5-tetramethyl-                 | 0.24                           |
| Benzene, 1-methyl-1,2-propadienyl-            | 0.91                           |
| (1-Methylbuta-1,3-dienyl)benzene              | 0.24                           |
| m-Cymene, 5-tert-butyl-                       | 0.20                           |
| Benzene, 1-(1,5-dimethyl-4-hexenyl)-4-methyl- | 1.43                           |
| <b>Polycyclic aromatic hydrocarbons</b>       | <b>3.01</b>                    |
| Indene                                        | 0.35                           |
| Indane, 1-methyl-                             | 0.24                           |
| Naphthalene                                   | 0.64                           |
| 1H-Indene, 4,7-dimethyl-                      | 0.23                           |
| Alloaroma dendrene                            | 0.40                           |
| Naphthalene, 2,6-dimethyl-                    | 0.20                           |
| Biphenylene                                   | 0.52                           |
| Fluorene                                      | 0.43                           |
| <b>Phenol derivatives</b>                     | <b>3.17</b>                    |
| Phenol                                        | 0.57                           |
| Phenol, 2-methyl-                             | 0.34                           |
| Phenol, 3-methyl-                             | 0.48                           |
| Phenol, 2-ethyl-                              | 0.24                           |
| Phenol, 2,6-dimethoxy-                        | 0.95                           |
| Phenol, 2-methoxy-4-(1-propenyl)-             | 0.28                           |

|                                                                |             |
|----------------------------------------------------------------|-------------|
| Phenol, 2,4-dimethyl-                                          | 0.31        |
| <b>Saturated aliphatic hydrocarbons</b>                        | <b>3.55</b> |
| Propane, 2-cyclopropyl-                                        | 0.33        |
| Cyclopropane, 1-methyl-2-octyl-                                | 0.26        |
| Cyclobutane, 1-butyl-2-ethyl-                                  | 0.19        |
| Nonadecane                                                     | 0.26        |
| Cyclohexane, 1,2-dimethyl-3-pentyl-4-propyl-                   | 1.17        |
| Tridecane, 7-propyl-                                           | 0.59        |
| Heneicosane                                                    | 0.40        |
| Pentadecane                                                    | 0.35        |
| <b>Unsaturated aliphatic hydrocarbons</b>                      | <b>8.30</b> |
| 1-Heptene                                                      | 0.39        |
| Cyclohexene, 1,2-dimethyl-                                     | 0.30        |
| Cyclooctene, 3-methyl-                                         | 0.24        |
| Bicycloocta-1,3,5-triene                                       | 3.17        |
| 5-Undecyne                                                     | 0.21        |
| 5-Tetradecyne                                                  | 0.26        |
| Caparratriene                                                  | 0.24        |
| 3-Eicosene                                                     | 0.54        |
| 2-Hexene, 3,5-dimethyl-                                        | 0.22        |
| 2-Hexene, 2-methyl-                                            | 0.24        |
| 7-Tetradecyne                                                  | 0.76        |
| 1-Pentadecyne                                                  | 0.22        |
| 8-Hexadecyne                                                   | 0.25        |
| Cyclohexene, 4-(4-ethylcyclohexyl)-1-pentyl-                   | 0.21        |
| 1-Hexadecyne                                                   | 0.20        |
| 1-Nonadecene                                                   | 0.50        |
| 2,6,10,14-Tetramethyl-7-(3-methylpent-4-enylidene) pentadecane | 0.35        |
| <b>Cyclooxxygenated organics</b>                               | <b>2.18</b> |
| 3-(2-Cyclopenten-1-yl)propanal                                 | 0.32        |
| Cyclopentanone                                                 | 0.28        |
| 2-Cyclopenten-1-one, 2-methyl-                                 | 1.09        |
| 1,2-Cyclopentanedione, 3-methyl-                               | 0.49        |
| <b>Others</b>                                                  | <b>3.98</b> |
| Acetic acid                                                    | 1.01        |
| 1,3-Dianhydro-4-O-acetyl- $\beta$ -mannopyranose               | 0.25        |
| Butanoic acid, 4-hydroxy-                                      | 0.34        |
| N-Pentadecanol                                                 | 0.30        |
| $\beta$ -D-Glucopyranose, 1,6-anhydro-                         | 0.31        |

|                                            |              |
|--------------------------------------------|--------------|
| 1,6,10-Dodecatrien-3-ol, 3,7,11-trimethyl- | 0.25         |
| 1H-Pyrazole, 1,3,5-trimethyl-              | 0.24         |
| Imidazole, 1,4,5-trimethyl-                | 0.20         |
| Benzenamine, 3-(1,2,3-thiadiazol-4-yl)-    | 0.27         |
| 1-Heptacosanol                             | 0.32         |
| 1-Decanol, 2-hexyl-                        | 0.20         |
| 1-Dodecanol, 2-octyl-                      | 0.29         |
| <b>Total</b>                               | <b>52.61</b> |

**Table S20. Composition of bio-oil obtained from experiment E14 on moisture free basis.**

| <b>Product</b>                           | <b>Composition (area%)</b> |
|------------------------------------------|----------------------------|
| <b>Furan derivatives</b>                 | <b>5.82</b>                |
| Furan, 2,5-dimethyl-                     | 0.86                       |
| Furfural                                 | 3.73                       |
| Ethanone, 1-(2-furanyl)-                 | 0.46                       |
| 2-Furancarboxaldehyde, 5-methyl-         | 0.30                       |
| Benzofuran, 2,3-dihydro-                 | 0.47                       |
| <b>Single ring aromatic hydrocarbons</b> | <b>18.88</b>               |
| Benzene                                  | 2.96                       |
| Toluene                                  | 8.69                       |
| Ethylbenzene                             | 0.95                       |
| P-Xylene                                 | 2.81                       |
| Styrene                                  | 2.19                       |
| Methylstyrene                            | 0.18                       |
| Benzene, 1-ethenyl-3-methyl-             | 0.37                       |
| Benzene, 1,2-diethyl-                    | 0.45                       |
| O-Cymene                                 | 0.28                       |
| <b>Polycyclic aromatic hydrocarbons</b>  | <b>4.14</b>                |
| 1H-Indene, octahydro-                    | 0.22                       |
| Indene                                   | 1.20                       |
| 2-Methylindene                           | 0.40                       |
| Naphthalene                              | 0.27                       |
| 1H-Indene, 2,3-dimethyl-                 | 0.21                       |
| Naphthalene, 2-methyl-                   | 1.61                       |
| Phenanthrene, 2-methyl-                  | 0.23                       |
| <b>Phenol derivatives</b>                | <b>2.60</b>                |
| Phenol                                   | 1.16                       |
| Phenol, 3-methyl-                        | 0.96                       |



|                                                             |              |
|-------------------------------------------------------------|--------------|
| Phenol, 2,5-dimethyl-                                       | 0.25         |
| Phenol, 2,6-dimethyl-                                       | 0.23         |
| <b>Saturated aliphatic hydrocarbons</b>                     | <b>3.56</b>  |
| 1-Heptene                                                   | 1.62         |
| Cyclopentane, 1,2-dimethyl-                                 | 0.34         |
| Bicycloheptane, 3-methyl-                                   | 0.17         |
| 1-Methylbicyclooctane                                       | 0.43         |
| 6-Tridecane                                                 | 0.40         |
| 1-Methylbicyclooctane                                       | 0.21         |
| Cyclohexane, (2,2-dimethylcyclopentyl)-                     | 0.19         |
| Cyclopentane, 1,1'-[3-(2-cyclopentylethyl)-1,5-pentanediy]- | 0.20         |
| <b>Unsaturated aliphatic hydrocarbons</b>                   | <b>17.12</b> |
| 1,3-Cyclopentadiene, 1-methyl-                              | 0.20         |
| Cyclopentene, 1-methyl-                                     | 0.22         |
| 3-Methylenecyclopentene                                     | 0.68         |
| Cyclopentene, 4,4-dimethyl-                                 | 0.20         |
| Cyclopentene, 3-undecyl-                                    | 0.20         |
| 1,3,5-Hexatriene, 3-methyl-                                 | 0.17         |
| 1-Heptene, 2-methyl-                                        | 0.81         |
| 1-Octene                                                    | 1.40         |
| 2-Octene                                                    | 0.19         |
| Cyclohexene, 1,2-dimethyl-                                  | 0.34         |
| 3-Heptene                                                   | 0.30         |
| 1-Heptene, 2,6-dimethyl-                                    | 0.27         |
| 1-Nonene                                                    | 0.87         |
| Cyclopropene, 1-butyl-2-ethyl-                              | 0.17         |
| 3-Octyne, 5-methyl-                                         | 0.17         |
| 1-Decene                                                    | 1.77         |
| D-Limonene                                                  | 0.32         |
| 1-Undecene                                                  | 2.19         |
| 1-Dodecene                                                  | 1.36         |
| 6-Dodecene                                                  | 0.28         |
| Cycloundecene, 1-methyl-                                    | 0.31         |
| 1-Octene, 3,7-dimethyl-                                     | 0.19         |
| 1-Heptene, 2,6-dimethyl-                                    | 0.23         |
| 5-Tetradecene                                               | 0.94         |
| 3-Dodecyne                                                  | 0.53         |
| Cyclohexene, 1-butyl-                                       | 0.24         |
| 5-Dodecyne                                                  | 0.18         |
| Cyclohexene, 1,6-dimethyl-                                  | 0.17         |
| 5-Octadecene                                                | 0.43         |

|                                |              |
|--------------------------------|--------------|
| 3-Eicosene                     | 0.64         |
| 1-Octadecene                   | 0.24         |
| 5-Octadecene                   | 0.24         |
| 8-Hexadecyne                   | 0.23         |
| 1-Octadecene                   | 0.23         |
| Ethylidenecyclobutane          | 0.21         |
| <b>Cycloxygenated organics</b> | <b>0.52</b>  |
| 2-Cyclopenten-1-one, 2-methyl- | 0.52         |
| <b>Others</b>                  | <b>2.16</b>  |
| 2-Propanone, 1-(acetyloxy)-    | 0.42         |
| 1-Octanol, 2-butyl-            | 0.18         |
| Longifolenaldehyde             | 0.30         |
| 1-Dodecanol, 3,7,11-trimethyl- | 0.36         |
| Docosanol                      | 0.18         |
| 1-Heptacosanol                 | 0.18         |
| 1-Decanol, 2-hexyl-            | 0.19         |
| P-Menth-8(10)-en-9-ol, cis-    | 0.18         |
| Methyl-8-hexadecyn-1-ol        | 0.17         |
| <b>Total</b>                   | <b>54.80</b> |

**Table S21. Composition of bio-oil obtained from experiment E15 on moisture free basis.**

| <b>Product</b>                           | <b>Composition (area%)</b> |
|------------------------------------------|----------------------------|
| <b>Furan derivatives</b>                 | <b>3.40</b>                |
| Furan, 2,5-dimethyl-                     | 0.22                       |
| Furfural                                 | 2.37                       |
| 2-Furanmethanol                          | 0.16                       |
| Ethanone, 1-(2-furanyl)-                 | 0.24                       |
| 2-Furancarboxaldehyde, 5-methyl-         | 0.41                       |
| <b>Single ring aromatic hydrocarbons</b> | <b>9.55</b>                |
| Toluene                                  | 3.68                       |
| P-Xylene                                 | 2.96                       |
| Benzene, 1,2,3-trimethyl-                | 0.15                       |
| Benzene, 1-ethyl-2-methyl-               | 2.59                       |
| 1,1'-Biphenyl, 2-methyl-                 | 0.17                       |
| <b>Polycyclic aromatic hydrocarbons</b>  | <b>5.32</b>                |
| Azulene                                  | 0.22                       |
| Naphthalene                              | 2.02                       |
| Naphthalene, 2-methyl-                   | 2.55                       |
| Phenanthrene, 9,10-dihydro-1-methyl-     | 0.32                       |

|                                                                |             |
|----------------------------------------------------------------|-------------|
| 9H-Fluorene, 9-methylene-                                      | 0.21        |
| <b>Phenol derivatives</b>                                      | <b>3.39</b> |
| Phenol                                                         | 0.18        |
| P-Cresol                                                       | 0.26        |
| Phenol, 2-methoxy-                                             | 1.59        |
| Phenol, 2,3-dimethyl-                                          | 0.63        |
| Phenol, 4-ethyl-                                               | 0.30        |
| 2-Methoxy-4-vinylphenol                                        | 0.43        |
| <b>Saturated aliphatic hydrocarbons</b>                        | <b>6.12</b> |
| Tridecane                                                      | 0.22        |
| Cyclohexane, 1,2-dimethyl-3-pentyl-4-propyl-                   | 3.00        |
| 2-methyltetracosane                                            | 0.16        |
| Cyclohexane, 1,1'-(1,2-dimethyl-1,2-ethanediyl)-               | 0.86        |
| Heneicosane                                                    | 0.43        |
| Octadecane                                                     | 0.48        |
| Hexadecane                                                     | 0.49        |
| Octadecane, 2,6,10,14-tetramethyl-                             | 0.48        |
| <b>Unsaturated aliphatic hydrocarbons</b>                      | <b>7.04</b> |
| 1-Nonene                                                       | 0.28        |
| 1,3-Hexadiene, 3-ethyl-2-methyl-                               | 0.16        |
| 1-Undecene                                                     | 0.36        |
| 4-Octyne, 2-methyl-                                            | 0.29        |
| 1-Dodecene                                                     | 0.28        |
| 8-Hexadecyne                                                   | 0.28        |
| 1-Nonadecene                                                   | 0.36        |
| 8-Hexadecyne                                                   | 0.38        |
| 9-Hexacosene                                                   | 0.42        |
| 1-Hexacosene                                                   | 0.42        |
| 2,6,10,14-Tetramethyl-7-(3-methylpent-4-enylidene) pentadecane | 3.81        |
| <b>Cyclooxxygenated organics</b>                               | <b>3.66</b> |
| Cyclopentanone                                                 | 0.31        |
| 2-Cyclopenten-1-one, 2-methyl-                                 | 0.97        |
| Cyclopentanone                                                 | 0.16        |
| 1,2-Cyclopentanedione                                          | 0.15        |
| 2-Cyclopenten-1-one, 3-methyl-                                 | 1.00        |
| 1,2-Cyclopentanedione, 3-methyl-                               | 0.84        |
| 4-Ethyl-2-hydroxycyclopent-2-en-1-one                          | 0.23        |
| <b>Others</b>                                                  | <b>9.00</b> |
| Acetic acid                                                    | 0.60        |
| 2-Propanone, 1-hydroxy-                                        | 3.59        |
| 3-Buten-2-one, 3-methyl-                                       | 0.28        |

|                                          |              |
|------------------------------------------|--------------|
| Propanoic acid                           | 0.31         |
| 3-Penten-2-one                           | 0.45         |
| 1,2-Ethanediol, diacetate                | 1.21         |
| 4-Ethylbenzoic acid, benzyl ester        | 0.14         |
| Benzene, 1,3,5-trimethoxy-               | 0.18         |
| Benzaldehyde, 4,6-dihydroxy-2,3-dimethyl | 0.20         |
| 3,3-Dimethyl-hepta-4,5-dien-2-ol         | 0.28         |
| 8-Hexadecenal, 14-methyl-                | 0.40         |
| Nonahexacontanoic acid                   | 0.42         |
| 1-Hexacosanol                            | 0.41         |
| Maltol                                   | 0.32         |
| 1H-Benzimidazole, 2-ethyl-               | 0.21         |
| <b>Total</b>                             | <b>47.48</b> |

**Table S22. Composition of bio-oil obtained from experiment E16 on moisture free basis.**

| <b>Product</b>                                                     | <b>Composition (area%)</b> |
|--------------------------------------------------------------------|----------------------------|
| <b>Furan derivatives</b>                                           | <b>6.46</b>                |
| Furfural                                                           | 3.78                       |
| Furan, 2,5-dihydro-2,2-dimethyl-5-(1-methylethenyl)-3-methylethyl- | 0.30                       |
| Butyrolactone                                                      | 0.16                       |
| Furan, 2,5-dimethyl-                                               | 0.17                       |
| Ethanone, 1-(2-furanyl)-                                           | 0.32                       |
| 2-Furancarboxaldehyde, 5-methyl-                                   | 1.73                       |
| <b>Single ring aromatic hydrocarbons</b>                           | <b>5.45</b>                |
| Benzene, 1-propynyl-                                               | 0.33                       |
| Benzene, 1-butynyl-                                                | 1.06                       |
| P-Xylene                                                           | 1.20                       |
| Benzene, 1-ethyl-3-methyl-                                         | 1.14                       |
| (1-Methylbuta-1,3-dienyl)benzene                                   | 0.13                       |
| Toluene                                                            | 1.21                       |
| Ethylbenzene                                                       | 0.38                       |
| <b>Polycyclic aromatic hydrocarbons</b>                            | <b>2.19</b>                |
| Naphthalene                                                        | 1.23                       |
| Naphthalene, 1-methyl-                                             | 0.96                       |
| <b>Phenol derivatives</b>                                          | <b>2.29</b>                |
| Phenol, 2-methoxy-                                                 | 0.25                       |
| Phenol                                                             | 0.63                       |
| P-Cresol                                                           | 1.20                       |

|                                                                |              |
|----------------------------------------------------------------|--------------|
| Phenol, 4-ethyl-                                               | 0.21         |
| <b>Saturated aliphatic hydrocarbons</b>                        | <b>5.24</b>  |
| Octadecane                                                     | 0.49         |
| Hexadecane, 2,6,10,14-tetramethyl-                             | 0.43         |
| Cyclobutane, 1,2-diethyl-, trans-                              | 0.17         |
| Eicosane                                                       | 0.25         |
|                                                                |              |
| Cyclohexane, 1,2-dimethyl-3-pentyl-4-propyl-                   | 3.50         |
| Cyclopentane, 1-pentyl-2-propyl-                               | 0.27         |
| Cyclooctane, 1,4-dimethyl-, cis-                               | 0.13         |
| <b>Unsaturated aliphatic hydrocarbons</b>                      | <b>11.44</b> |
| 1,3,5,7-Cyclooctatetraene                                      | 1.24         |
| 12-Pentacosene                                                 | 0.93         |
| 7-Tetradecyne                                                  | 0.12         |
| 6-Dodecyne                                                     | 0.15         |
| 4-Undecene                                                     | 0.15         |
| 1-Octene                                                       | 0.18         |
| 1-Nonene                                                       | 0.49         |
| 1-Nonadecene                                                   | 0.47         |
| 1-Eicosene                                                     | 0.13         |
| 1-Dodecene                                                     | 0.58         |
| 1-Docosene                                                     | 0.47         |
| 1-Decene                                                       | 0.57         |
| 1,3-Hexadien-5-yne                                             | 1.09         |
| 7-Tetradecene                                                  | 0.17         |
| 1-Hexacosene                                                   | 0.36         |
| 1-Heptene                                                      | 0.29         |
| 1,4-Cyclohexadiene, 3-ethenyl-1,2-dimethyl                     | 0.22         |
| 2,6,10,14-Tetramethyl-7-(3-methylpent-4-enylidene) pentadecane | 3.83         |
| <b>Cycloxygenated organics</b>                                 | <b>1.55</b>  |
| 2-Cyclopenten-1-one, 3-methyl-                                 | 0.37         |
| 2-Cyclopenten-1-one, 2-methyl-                                 | 0.78         |
| 2-Cyclopenten-1-one, 2,3-dimethyl-                             | 0.40         |
| <b>Others</b>                                                  | <b>3.06</b>  |
| 3,3-Dimethyl-hepta-4,5-dien-2-ol                               | 0.46         |
| 2-Propenal, 2-methyl-3-phenyl-                                 | 0.24         |
| 1-Undecanol                                                    | 1.30         |
| 3-Penten-2-one                                                 | 0.25         |
| 1,2-Ethanediol, diacetate                                      | 0.32         |
| 4-Ethylbenzoic acid, benzyl ester                              | 0.21         |
| 3-Penten-2-one                                                 | 0.28         |

|              |              |
|--------------|--------------|
| <b>Total</b> | <b>37.68</b> |
|--------------|--------------|

**Table S23. Composition of bio-oil obtained from experiment E17 on moisture free basis.**

| <b>Product</b>                                  | <b>Composition (area%)</b> |
|-------------------------------------------------|----------------------------|
| <b>Furan derivatives</b>                        | <b>6.84</b>                |
| Furan, 2,3-dihydro-3-methyl-                    | 0.71                       |
| Furan, 2,5-dimethyl-                            | 0.37                       |
| Furfural                                        | 4.57                       |
| Ethanone, 1-(2-furanyl)-                        | 0.42                       |
| Butyrolactone                                   | 0.34                       |
| Benzofuran, 2,3-dihydro-                        | 0.13                       |
| 2-Furancarboxaldehyde, 5-methyl-                | 0.30                       |
| <b>Single ring aromatic hydrocarbons</b>        | <b>6.41</b>                |
| Toluene                                         | 3.24                       |
| Ethylbenzene                                    | 0.32                       |
| P-Xylene                                        | 1.65                       |
| Benzene, 1,2,3-trimethyl-                       | 0.66                       |
| Benzene, 1-ethenyl-3-methyl-                    | 0.16                       |
| Benzene, 1-propynyl-                            | 0.25                       |
| Hexa-2,4-dienylbenzene                          | 0.13                       |
| <b>Polycyclic aromatic hydrocarbons</b>         | <b>3.77</b>                |
| Naphthalene                                     | 1.03                       |
| Naphthalene, 2,6-bis(1,1-dimethylethyl)-        | 0.35                       |
| 2-Ethyl-1-H-indene                              | 0.15                       |
| Naphthalene, 2-methyl-                          | 1.17                       |
| Naphthalene, 1,7-dimethyl-                      | 0.21                       |
| 7-Methanoazulene, octahydro-1,4,9,9-tetramethyl | 0.33                       |
| Anthracene                                      | 0.53                       |
| <b>Phenol derivatives</b>                       | <b>5.26</b>                |
| Phenol                                          | 0.81                       |
| P-Cresol                                        | 2.41                       |
| Phenol, 2-methoxy-                              | 0.49                       |
| Phenol, 2,4-dimethyl-                           | 0.68                       |
| Phenol, 4-ethyl-                                | 0.39                       |
| 2-Methoxy-4-vinylphenol                         | 0.48                       |
| <b>Saturated aliphatic hydrocarbons</b>         | <b>6.02</b>                |
| Cyclopropane, pentyl-                           | 0.18                       |
| Cyclopropane, octyl-                            | 0.41                       |
| Decane, 2,3,5-trimethyl-                        | 0.24                       |

|                                                                |              |
|----------------------------------------------------------------|--------------|
| Heptadecane                                                    | 0.19         |
| Pentadecane, 2-methyl-                                         | 0.33         |
| Cyclopentane, (2-hexyloctyl)-                                  | 0.36         |
| Nonadecane                                                     | 0.39         |
| Cyclohexane, 1,2-dimethyl-3-pentyl-4-propyl-                   | 3.92         |
| <b>Unsaturated aliphatic hydrocarbons</b>                      | <b>12.12</b> |
| 1-Heptene                                                      | 0.18         |
| 1-Nonene                                                       | 0.27         |
| 1-Decene                                                       | 0.32         |
| 4-Octyne, 2-methyl-                                            | 0.16         |
| 1-Dodecene                                                     | 0.39         |
| 5-Tetradecene                                                  | 0.14         |
| 1-Tridecene                                                    | 0.44         |
| Cyclohexene, 1,2-dimethyl-                                     | 0.13         |
| Camphene                                                       | 0.14         |
| 7-Hexadecyne                                                   | 0.12         |
| 1-Nonadecene                                                   | 0.89         |
| 1-Hexacosene                                                   | 0.89         |
| Cyclopropane, trimethylmethylene-                              | 0.13         |
| 2,6,10,14-Tetramethyl-7-(3-methylpent-4-enylidene) pentadecane | 7.92         |
| <b>Cycloxygenated organics</b>                                 | <b>1.07</b>  |
| 2-Cyclopenten-1-one, 2-methyl-                                 | 0.94         |
| Cyclohexaneethanol, 4-methyl-.beta-methylene                   | 0.13         |
| <b>Others</b>                                                  | <b>5.81</b>  |
| 2-Propanone, 1-hydroxy-                                        | 2.48         |
| 3-Penten-2-one                                                 | 0.23         |
| 2-Penten-1-ol                                                  | 0.15         |
| 1,2-Ethandiol, diacetate                                       | 0.85         |
| Cis-1-Ethoxy-1-butene                                          | 0.17         |
| 2-Butanone, 1-(acetyloxy)-                                     | 0.53         |
| 1-Dodecanol                                                    | 0.19         |
| Maltol                                                         | 0.36         |
| 1H-Indazole, 3,6-dimethyl-                                     | 0.35         |
| 1-(4-Tert-Butylphenyl)propan-2-one                             | 0.15         |
| 3,3-Dimethyl-hepta-4,5-dien-2-ol                               | 0.35         |
| <b>Total</b>                                                   | <b>47.30</b> |

**Table S24. C, H and O content in MSW feed and bio-oil. Reaction conditions correspond to 1:1 wt./wt. of MSW:graphite**

| Feedstock    | Feed composition (%) |      |       | Bio-oil composition (%) |       |      |
|--------------|----------------------|------|-------|-------------------------|-------|------|
|              | C                    | H    | O     | C                       | H     | O    |
| <b>MSW-A</b> | 53.26                | 8.01 | 37.96 | 82.9                    | 11.38 | 5.71 |
| <b>MSW-B</b> | 59.65                | 9.37 | 30.37 | 84.64                   | 12    | 3.36 |
| <b>MSW-C</b> | 51.19                | 7.67 | 40.52 | 80.63                   | 11.2  | 8.17 |
| <b>MSW-D</b> | 51.73                | 7.56 | 39.95 | 83.05                   | 11.51 | 5.45 |
| <b>MSW-E</b> | 50.47                | 7.45 | 41.01 | 82.2                    | 11.1  | 6.7  |

C, H and O content in bio-oil was evaluated by calculating C, H and O yields of the bio-oil components from GC/MS data.
